# Supplementary material for: Extensive Transcriptional Regulation of Chromatin Modifiers during Human Neurodevelopment
Source: PLoS One. 2012 May 9;7(5):e36708. doi: 10.1371/journal.pone.0036708 (PMC3348879; doi:10.1371/journal.pone.0036708)
Supplement: Figure S4 — 150 Epigenetic regulators examined in this study. The epigenetic regulator genes investigated in this study by qPCR are listed alphabetically by their gene symbol. The cDNAs are defined by the respective RefSeq accession numbers (as used in NCBI data bases). Alternative gene names frequently used in the literature have been added in paretheses. The references provide further background information. (PDF) [file pone.0036708.s004.pdf]

**Figure S4: 150 epigenetic regulators examined in this study**

| Gene             | Description                                                                                 | Ref     | Accession No. |
|------------------|---------------------------------------------------------------------------------------------|---------|---------------|
| ARID1A (BAF250a) | defining subunit of the BAF co-repressor complex                                            | [1]     | NM_006015     |
| ASH1L            | methylation of H3K4 and / or K36                                                            | [2,3]   | NM_018489     |
| ATF2             | CRE binding protein, component of Tip60 HAT complex                                         | [4]     | NM_001880     |
| AURKA            | phosphorylation of H3S10, role in mitosis                                                   | [5]     | NM_003600     |
| AURKB            | phosphorylation of H3S10, role in mitosis                                                   | [5]     | NM_004217     |
| AURKC            | phosphorylation of H3S10, role in mitosis                                                   | [6]     | NM_003160     |
| BAF45A (PHF10)   | component of neural progenitor BAF complex                                                  | [7]     | NM_133325     |
| BAF53A           | component of neural progenitor BAF complex                                                  | [7]     | NM_004301     |
| BAF53B           | component of neuron BAF complex                                                             | [7]     | NM_016188     |
| BAF60A (SMARCD1) | general component of BAF complex                                                            | [7]     | NM_003076     |
| BAF60C (SMARCD3) | component of neural progenitor and neuron BAF complex                                       | [7]     | NM_003078     |
| BAZ1A (hACF1)    | component of remodeling complexes ACF, CHRAC, WICH                                          | [8]     | NM_182648     |
| BAZ1B (WSTF)     | subunit of chromatin remodeling complexes WHICH and WINAC                                   | [8]     | NM_032408     |
| BAZ2A            | bromo domain protein, component of NoRC complex                                             | [9]     | NM_013450     |
| BAZ2B            | bromodomain protein, component of NoRC complex                                              | [10]    | NM_013450     |
| BM11             | component of PRC1, required for self-renewal of neural and neural crest stem cells in mouse | [11]    | NM_005180     |
| BPTF (NURF301)   | H3K4me binding, specific component of NURF complex                                          | [12]    | NM_182641     |
| BRD1             | bromodomain protein, component of MOZ/MORF complex, expressed in brain                      | [13]    | NM_014577     |
| BRD2             | bromodomain protein, binds to H3K12Ac, H4K5Ac, H4K12Ac                                      | [14]    | NM_005104     |
| BRD3             | bromodomain protein, binds to H3K12Ac, H4K5Ac, H4K12Ac                                      | [15]    | NM_007371     |
| BRD4             | bromodomain protein, binds to H3K12Ac, H4K5Ac, H4K12Ac                                      | [14]    | NM_014299     |
| BRD7             | bromodomain protein binds to H3K14Ac defining subunit of PBAF complex                       | [1]     | NM_013263     |
| BRD8             | bromo domain protein, component of Tip60 HAT complex                                        | [16]    | NM_183359     |
| BRPF1            | component of MOZ/MORF complex, stimulates HAT activity                                      | [13,17] | NM_004634     |
| BRPF3            | component of MOZ/MORF complex                                                               | [13]    | NM_015695     |

| Gene                 | Description                                                                                                                          | Ref     | Accession No. |
|----------------------|--------------------------------------------------------------------------------------------------------------------------------------|---------|---------------|
| BRWD1                | bromo domain protein                                                                                                                 | [18]    | NM_018963     |
| CARM1 (PRMT4)        | type I arginine methyl transferase, methylates H3R17 and H3R26, transcriptional activation                                           | [19]    | NM_199141     |
| CBX1 (HP1 $\beta$ )  | binds to H3K9me <sub>3</sub> , formation of heterochromatin                                                                          | [20]    | NM_006807     |
| CBX3 (HP1 $\gamma$ ) | binds to H3K9me <sub>3</sub> , located in heterochromatin as well as euchromatin, role in gene silencing in euchromatin              | [20]    | NM_007276     |
| CBX4 (Pc2)           | component of PRC1, binding to H3K27me <sub>3</sub> and K9me <sub>3</sub>                                                             | [21,22] | NM_003655     |
| CBX5 (HP1 $\alpha$ ) | chromodomain protein, located exclusively in heterochromatin                                                                         | [23]    | NM_012117     |
| CBX6                 | chromodomain protein, but no binding to methylated histones is described                                                             | [24]    | NM_014292     |
| CBX7                 | chromodomain protein, Pc homologue, binds to H3K9me and H3K27me, interacts with Ring1b                                               | [25]    | NM_175709     |
| CBX8                 | component of PRC1, binds to H3K37me <sub>3</sub>                                                                                     | [11]    | NM_020649     |
| CDYL                 | chromodomain protein, involved in transcriptional repression as a component of the REST complex, not able to bind methylated lysines | [26]    | NM_004824     |
| CDYL2                | chromodomain protein, binds to H3K9me <sub>3</sub> , H1.4K26me <sub>3</sub>                                                          | [26]    | NM_152342     |
| CHD1                 | chromodomain protein, ATPase, subunit of CHD1, binds to H3K4me <sub>1, 2</sub> and <sub>3</sub>                                      | [8]     | NM_001270     |
| CHD2                 | chromodomain protein, expressed in forebrain in mouse                                                                                | [27]    | NM_001271     |
| CHD3 (Mi-2a)         | chromodomain protein, ATPase, subunit of NuRD                                                                                        | [8]     | NM_001005273  |
| CHD4 (Mi-2b)         | chromodomain protein, ATPase, subunit of NuRD, interaction partner of NAB2                                                           | [8]     | NM_001273     |
| CHD5                 | chromodomain protein, similar to CHD3 and CHD4, expressed in neural tissue and neurons but not in glia cells                         | [28,29] | NM_015557     |
| CHD6                 | chromodomain protein, might have a role in motor coordination                                                                        | [30]    | NM_032221     |
| CHD7                 | chromodomain protein, binds to H3K4me, role in neural crest formation                                                                | [31]    | NM_017780     |
| CHD8                 | chromodomain protein, involved in insulation of heterochromatin                                                                      | [8,32]  | NM_020920     |
| CHD9                 | chromodomain protein, poorly characterised, ATPase activity                                                                          | [32]    | NM_025134     |
| CSR2BP (ATAC2)       | acetylation of H3 and H4                                                                                                             | [33]    | NM_177926     |
| CTBP1                | inhibition of transcription by binding to p300 and / or by complex formation with HDAC1/2                                            | [34,35] | NM_001328     |
| CTBP2                | in complex with CTBP1, k.o. mice defects in neuronal development                                                                     | [36]    | NM_022802     |
| CTCF                 | insulator protein, organisation of chromatin territories                                                                             | [37]    | NM_006565     |
| DNMT1                | CpG methylation, maintenance of DNA methylation status                                                                               | [38]    | NM_001379     |
| DNMT3A               | de novo DNA methylation                                                                                                              | [38]    | NM_022552     |

| Gene               | Description                                                                                                                                    | Ref     | Accession No. |
|--------------------|------------------------------------------------------------------------------------------------------------------------------------------------|---------|---------------|
| DNMT3B             | de novo DNA methylation, hESC stem cell marker                                                                                                 | [38,39] | NM_006892     |
| DOT1L (KMT4)       | methylation of H3K79                                                                                                                           | [40]    | NM_032482     |
| DZIP3              | ubiquitination of H2AK119, blocks transcriptional elongation                                                                                   | [41]    | NM_0146648    |
| EED                | component of PRC2                                                                                                                              | [11]    | NM_003797     |
| EHMT2 (G9a, KMT1C) | methylation of H3K9me1 and me2 in euchromatic regions                                                                                          | [40]    | NM_006709     |
| ESCO1              | component of cohesin, slight acetylation activity towards non-histone proteins, repression of transcription via interaction with LSD1 in yeast | [42]    | NM_052911     |
| ESCO2              | component of cohesin, repression of transcription via interaction with CoREST and G9a in yeast                                                 | [42]    | NM_001017420  |
| EZH1               | methylation of H3K27me3, component of PRC2, expressed in adult tissue and able to compact chromatin                                            | [43,44] | NM_001991     |
| EZH2               | methylation of H3K27me3, component of PRC2                                                                                                     | [11]    | NM_004456     |
| HAT1               | acetylation of H3K5 and H3K12                                                                                                                  | [45]    | NM_003642     |
| HDAC1              | histone deacetylation, class I HDAC, component of BHC complex, involved in repression of neuronal genes                                        | [46,47] | NM_004964     |
| HDAC10             | histone deacetylation, class II HDAC                                                                                                           | [46]    | NM_032019     |
| HDAC11             | histone deacetylation, class IV HDAC                                                                                                           | [46]    | NM_024827     |
| HDAC2              | histone deacetylation, class II HDAC,                                                                                                          | [46]    | NM_001527     |
| HDAC3              | histone deacetylation, class I HDAC,                                                                                                           | [46]    | NM_003883     |
| HDAC4              | histone deacetylation, class II HDAC, highly expressed in brain                                                                                | [46]    | NM_006037     |
| HDAC5              | histone deacetylation, class II HDAC                                                                                                           | [46]    | NM_005474     |
| HDAC6              | histone deacetylation, class II HDAC                                                                                                           | [46]    | NM_006044     |
| HDAC7              | histone deacetylation, class II HDAC                                                                                                           | [46]    | NM_016596     |
| HDAC8              | histone deacetylation, class I HDAC                                                                                                            | [46]    | NM_018486     |
| HDAC9              | histone deacetylation, class III HDAC                                                                                                          | [46]    | NM_178425     |
| ING1               | PHD domain, binds to H3K4me, binds to Phosphatidylinositol, associated with p300 and HDAC1/2                                                   | [48]    | NM_001537     |
| ING2               | PHD domain, binds to H3K4me, binds to Phosphatidylinositol, associated with p300 and HDAC1/2                                                   | [48]    | NM_001564     |
| ING3               | component of Tip60 HAT complex, binding to H3K4me via PHD domain,                                                                              | [48,49] | NM_198267     |
| ING4               | PHD domain, binds to H3K4me                                                                                                                    | [48]    | NM_016162     |
| ING5               | binds to H3K4me, PHD containing protein, component of HBO1 and MOZ/MORF complex                                                                | [50]    | NM_032329     |

| Gene               | Description                                                                                                | Ref     | Accession No. |
|--------------------|------------------------------------------------------------------------------------------------------------|---------|---------------|
| INO80              | ATPase subunit of INO80                                                                                    | [8]     | NM_017553     |
| KAT2A (GCN5)       | acetylation of multiple lysines in H3, component of GCN5 complex                                           | [45]    | NM_021078     |
| KAT2B              | acetylation of H3K9, K14, K18                                                                              | [40,45] | NM_003884     |
| KAT5 (Tip60)       | histone acetylation, several K residues                                                                    | [45]    | NM_006388     |
| KDM1 (LSD1)        | Demethylation of H3K4 and K9 me2 and me1, regulates terminal differentiation                               | [51,52] | NM_015013     |
| KDM4A              | Demethylation of H3K9me3/2 and H3K36me3/2                                                                  | [51]    | NM_014663     |
| KDM4C              | Demethylation of H3K9/K36me2 and me3                                                                       | [51]    | NM_015061     |
| KDM5B              | Demethylation of H3K4me2 and me3,                                                                          | [51]    | NM_006618     |
| KDM5C              | Demethylation of H3K4me2 and me3, increased expression in mouse brain                                      | [51]    | NM_004187     |
| KDM6B              | Demethylation of H3K27me, required for early neural differentiation                                        | [51,53] | NM_001080424  |
| MBD1               | methyl CpG binding, involved in HP1 mediated heterochromatin formation                                     | [38]    | NM_015844     |
| MBD2               | methyl CpG binding, component of NuRD complex, involved in Oct4 silencing                                  | [38]    | NM_003927     |
| MBD3               | CpG methyl binding protein, component of NuRD complex                                                      | [8,38]  | NM_003926     |
| MBD4               | methyl-CpG binding protein                                                                                 | [38]    | NM_003925     |
| MECP2              | methyl CpG binding, represses BDNF promotor and is released upon depolarisation of neurons                 | [38]    | NM_004992     |
| MLL                | methylation of H3K4                                                                                        | [40]    | NM_005933     |
| MLL3               | methylation of H3K4                                                                                        | [40]    | NM_170606     |
| MLL5 (KMT2E)       | methylation of H3K4me1 and me2                                                                             | [40]    | NM_182931     |
| MTA1               | subunit of chromatin remodeling complex NURD                                                               | [8]     | NM_004689     |
| MTA2               | subunit of chromatin remodeling complex NURD                                                               | [8]     | NM_004739     |
| MYSM1              | Deubiquitination of H2A                                                                                    | [54]    | NM_001085487  |
| MYST1 (MOF)        | acetylation of H4K16                                                                                       | [45]    | NM_032188     |
| MYST2 (MOZ, KAT7)  | acetylation of H4K5, K8 and K12, role in cell cycle progression                                            | [45]    | NM_007067     |
| MYST3 (MOZ, KAT6A) | acetylation of H3K14                                                                                       | [55]    | NM_006766     |
| MYST4              | acetylation of H3K14                                                                                       | [55]    | NM_012330     |
| NCOA1 (KAT13A)     | H3K9 acetylation, up-regulated neuronal committed cells in mice (not in NSC), nuclear receptor coactivator | [45,56] | NM_003743     |

| Gene                 | Description                                                                                        | Ref     | Accession No. |
|----------------------|----------------------------------------------------------------------------------------------------|---------|---------------|
| NCOA3 (KAT13B, ACTR) | acetylation, nuclear receptor coactivator,                                                         | [45,57] | NM_181659     |
| NEK6                 | kinase, expressed in PNS and CNS neurons                                                           | [58]    | NM_014397     |
| NSD1 (KMT3B)         | methylation of H4K20 and H3K36                                                                     | [40]    | NM_022455     |
| PAK1                 | p21-activated kinase, expressed in brain                                                           | [59]    | NM_002576     |
| PBRM1                | targeting unit of PBAF complex, defining subunit                                                   | [8,60]  | NM_018165     |
| PCGF1                | component of PRC1                                                                                  | [11]    | NM_032673     |
| PCGF2 (Mel18)        | component of PRC1                                                                                  | [11]    | NM_007144     |
| PHC1                 | polyhomeotic homolog, component of PRC1                                                            | [11]    | NM_004426     |
| PHC2                 | component of PRC1, mediates Hox gene expression together with PHC1                                 | [11]    | NM_198040     |
| PHF1                 | PHD finger protein, binds to PRC2 and stimulates EZH2                                              | [11]    | NM_002636     |
| PHF13 (SPOC1)        | PHD finger protein, binds to H3K9me3 and H3K36me3, involved in chromatin condensation              | [61]    | NM_153812     |
| PHF2                 | component of PRC1, mediates Hox gene expression together with PHC1                                 | [11]    | NM_198040     |
| PHF21A (BHC80)       | PHD finger protein, inhibits LSD1                                                                  | [62]    | NM_016621     |
| PRMT1                | type I arginine methyl transferase, methylates H4R3 and H2AR3 besides many non histone substrates. | [19]    | NM_001536     |
| PRMT2                | type I arginine methyl transferase, no methyl-transferase activity shown yet                       | [19]    | NM_001535     |
| PRMT3                | type I arginine methyl transferase, located in cytoplasm                                           | [19]    | NM_005788     |
| PRMT5                | type II arginine methyl transferase, methylates H4R3 and H2AR3                                     | [19]    | NM_006109     |
| PRMT6                | type I arginine methyl transferase, methylates H3R2me                                              | [19,63] | NM_018137     |
| PRMT7                | type II arginine methyl transferase, methylates H4R3 and H2AR3                                     | [19]    | NM_019023     |
| PRMT8                | Arginine methylation, brain specific in mouse                                                      | [19]    | NM_019854     |
| RING1 (RING1A)       | component of PRC1, stimulates H2AK119ub activity of RING1B                                         | [11,64] | NM_002931     |
| RNF2 (RING1B)        | component of PRC1, ubiquitination of H2AK119                                                       | [11]    | NM_007212     |
| RNF20                | ubiquitination of H2BK120                                                                          | [65]    | NM_019592     |
| RPS6KA3              | H3S10 phosphorylation                                                                              | [66]    | NM_004586     |
| RPS6KA5              | H3S10 phosphorylation, stress induced                                                              | [6]     | NM_004755     |
| SETD1A (SET1)        | methylation of H3K4                                                                                | [40]    | NM_014712     |

| Gene                 | Description                                                              | Ref      | Accession No. |
|----------------------|--------------------------------------------------------------------------|----------|---------------|
| SETD1B (KMT2G)       | methylation of H3K4                                                      | [40]     | XM_037523     |
| SETD2                | SET domain protein, methylation of H3K36                                 | [67]     | NM_014159     |
| SETD7 (Set7/9, KMT7) | methylation of H3K4                                                      | [40]     | NM_030648     |
| SETD8                | methylation of H4K20me1, required for cell cycle progression             | [40,68]  | NM_020382     |
| SETDB1 (ESET, KMT1B) | methylation of H3K9me2 and me3, involved in glutamat receptor expression | [40,69]  | NM_012432     |
| SETDB2 (KMT1F)       | methylation of H3K9, inhibits dorsal regulator FGF8                      | [40,70]  | NM_031915     |
| SMARCA2              | ATPase subunit of hBAF complex                                           | [8]      | NM_003070     |
| SMARCA4              | ATPase subunit of hBAF and PBAF complexes                                | [8]      | NM_003072     |
| SMYD3                | methylation of H3K4                                                      | [71]     | NM_022743     |
| SPEN                 | associated with Co-REST complex                                          | [72]     | NM_015001     |
| SUV39H1              | methylation of H3K9me3                                                   | [40]     | NM_003173     |
| SUV420H1             | methylation of H4K20me3                                                  | [40]     | NM_016028     |
| SUZ12                | component of PRC2                                                        | [11]     | NM_015355     |
| TET1                 | methylation of hydroxy methyl cytosin                                    | [70]     | NM_030625     |
| TET2                 | methylation of hydroxy methyl cytosin                                    | [70]     | NM_001127208  |
| UBE2A (RAD6A)        | ubiquitination of H2BK120, transcriptional activation                    | [73]     | NM_003336     |
| UBE2B (RAD6B)        | ubiquitination of H2BK120                                                | [73]     | NM_003337     |
| USP16                | deubiquitination of H2A                                                  | [54]     | NM_006447     |
| USP21                | deubiquitination of H2A                                                  | [54]     | NM_012475     |
| USP22                | deubiquitination of H2B                                                  | [74]     | NM_015276     |
| WHSC1 (NSD2, MMSET)  | methylation of H4K20 and/or H3K36                                        | [[75,76] | NM_007331     |

## References

1. Kaeser MD, Aslanian A, Dong MQ, Yates JR, 3rd, Emerson BM (2008) BRD7, a novel PBAF-specific SWI/SNF subunit, is required for target gene activation and repression in embryonic stem cells. *J Biol Chem* 283: 32254-32263.
2. Gregory GD, Vakoc CR, Rozovskaia T, Zheng X, Patel S, et al. (2007) Mammalian ASH1L is a histone methyltransferase that occupies the transcribed region of active genes. *Mol Cell Biol* 27: 8466-8479.
3. Tanaka Y, Katagiri Z, Kawahashi K, Kioussis D, Kitajima S (2007) Trithorax-group protein ASH1 methylates histone H3 lysine 36. *Gene* 397: 161-168.
4. Bhoumik A, Ronai Z (2008) ATF2: a transcription factor that elicits oncogenic or tumor suppressor activities. *Cell Cycle* 7: 2341-2345.
5. Pascreau G, Arlot-Bonnemains Y, Prigent C (2003) Phosphorylation of histone and histone-like proteins by aurora kinases during mitosis. *Prog Cell Cycle Res* 5: 369-374.

6. Nowak SJ, Corces VG (2004) Phosphorylation of histone H3: a balancing act between chromosome condensation and transcriptional activation. *Trends Genet* 20: 214-220.
7. Lessard J, Wu JI, Ranish JA, Wan M, Winslow MM, et al. (2007) An essential switch in subunit composition of a chromatin remodeling complex during neural development. *Neuron* 55: 201-215.
8. Clapier CR, Cairns BR (2009) The biology of chromatin remodeling complexes. *Annu Rev Biochem* 78: 273-304.
9. Zhou Y, Grummt I (2005) The PHD finger/bromodomain of NoRC interacts with acetylated histone H4K16 and is sufficient for rDNA silencing. *Curr Biol* 15: 1434-1438.
10. Grummt I (2007) Different epigenetic layers engage in complex crosstalk to define the epigenetic state of mammalian rRNA genes. *Hum Mol Genet* 16 Spec No 1: R21-27.
11. Simon JA, Kingston RE (2009) Mechanisms of polycomb gene silencing: knowns and unknowns. *Nat Rev Mol Cell Biol* 10: 697-708.
12. Xiao H, Sandaltzopoulos R, Wang HM, Hamiche A, Ranallo R, et al. (2001) Dual functions of largest NURF subunit NURF301 in nucleosome sliding and transcription factor interactions. *Mol Cell* 8: 531-543.
13. Ullah M, Pelletier N, Xiao L, Zhao SP, Wang K, et al. (2008) Molecular architecture of quartet MOZ/MORF histone acetyltransferase complexes. *Mol Cell Biol* 28: 6828-6843.
14. Shang E, Salazar G, Crowley TE, Wang X, Lopez RA, et al. (2004) Identification of unique, differentiation stage-specific patterns of expression of the bromodomain-containing genes Brd2, Brd3, Brd4, and Brdt in the mouse testis. *Gene Expr Patterns* 4: 513-519.
15. LeRoy G, Rickards B, Flint SJ (2008) The double bromodomain proteins Brd2 and Brd3 couple histone acetylation to transcription. *Mol Cell* 30: 51-60.
16. Doyon Y, Cayrou C, Ullah M, Landry AJ, Cote V, et al. (2006) ING tumor suppressor proteins are critical regulators of chromatin acetylation required for genome expression and perpetuation. *Mol Cell* 21: 51-64.
17. Laue K, Daujat S, Crump JG, Plaster N, Roehl HH, et al. (2008) The multidomain protein Brpf1 binds histones and is required for Hox gene expression and segmental identity. *Development* 135: 1935-1946.
18. Philipps DL, Wigglesworth K, Hartford SA, Sun F, Pattabiraman S, et al. (2008) The dual bromodomain and WD repeat-containing mouse protein BRWD1 is required for normal spermiogenesis and the oocyte-embryo transition. *Dev Biol* 317: 72-82.
19. Di Lorenzo A, Bedford MT (2011) Histone arginine methylation. *FEBS letters* 585: 2024-2031.
20. Kwon SH, Workman JL (2008) The heterochromatin protein 1 (HP1) family: put away a bias toward HP1. *Mol Cells* 26: 217-227.
21. Ruddock-D'Cruz NT, Prashadkumar S, Wilson KJ, Heffernan C, Cooney MA, et al. (2008) Dynamic changes in localization of Chromobox (Cbx) family members during the maternal to embryonic transition. *Mol Reprod Dev* 75: 477-488.
22. Vincenz C, Kerppola TK (2008) Different polycomb group CBX family proteins associate with distinct regions of chromatin using nonhomologous protein sequences. *Proc Natl Acad Sci U S A* 105: 16572-16577.
23. Bartova E, Krejci J, Harnicarova A, Galiova G, Kozubek S (2008) Histone modifications and nuclear architecture: a review. *J Histochem Cytochem* 56: 711-721.
24. Ren X, Vincenz C, Kerppola TK (2008) Changes in the distributions and dynamics of polycomb repressive complexes during embryonic stem cell differentiation. *Mol Cell Biol* 28: 2884-2895.
25. Bernstein E, Duncan EM, Masui O, Gil J, Heard E, et al. (2006) Mouse polycomb proteins bind differentially to methylated histone H3 and RNA and are enriched in facultative heterochromatin. *Mol Cell Biol* 26: 2560-2569.
26. Fischle W, Franz H, Jacobs SA, Allis CD, Khorasanizadeh S (2008) Specificity of the chromodomain Y chromosome family of chromodomains for lysine-methylated ARK(S/T) motifs. *J Biol Chem* 283: 19626-19635.
27. Kulkarni S, Nagarajan P, Wall J, Donovan DJ, Donnell RL, et al. (2008) Disruption of chromodomain helicase DNA binding protein 2 (CHD2) causes scoliosis. *Am J Med Genet A* 146A: 1117-1127.
28. Garcia I, Mayol G, Rodriguez E, Sunol M, Gershon TR, et al. (2010) Expression of the neuron-specific protein CHD5 is an independent marker of outcome in neuroblastoma. *Molecular cancer* 9: 277.
29. Thompson PM, Gotoh T, Kok M, White PS, Brodeur GM (2003) CHD5, a new member of the chromodomain gene family, is preferentially expressed in the nervous system. *Oncogene* 22: 1002-1011.
30. Lutz T, Stoger R, Nieto A (2006) CHD6 is a DNA-dependent ATPase and localizes at nuclear sites of mRNA synthesis. *FEBS Lett* 580: 5851-5857.
31. Bajpai R, Chen DA, Rada-Iglesias A, Zhang J, Xiong Y, et al. CHD7 cooperates with PBAF to control multipotent neural crest formation. *Nature* 463: 958-962.
32. Marfella CG, Imbalzano AN (2007) The Chd family of chromatin remodelers. *Mutat Res* 618: 30-40.
33. Guelman S, Kozuka K, Mao Y, Pham V, Solloway MJ, et al. (2009) The double-histone-acetyltransferase complex ATAC is essential for mammalian development. *Molecular and cellular biology* 29: 1176-1188.
34. Kim JH, Cho EJ, Kim ST, Youn HD (2005) CtBP represses p300-mediated transcriptional activation by direct association with its bromodomain. *Nat Struct Mol Biol* 12: 423-428.
35. Shi Y, Sawada J, Sui G, Affar el B, Whetstone JR, et al. (2003) Coordinated histone modifications mediated by a CtBP co-repressor complex. *Nature* 422: 735-738.
36. Chinnadurai G (2002) CtBP, an unconventional transcriptional corepressor in development and oncogenesis. *Mol Cell* 9: 213-224.
37. Ohlsson R, Lobanenko V, Klenova E Does CTCF mediate between nuclear organization and gene expression? *Bioessays* 32: 37-50.
38. Bogdanovic O, Veenstra GJ (2009) DNA methylation and methyl-CpG binding proteins: developmental requirements and function. *Chromosoma* 118: 549-565.
39. Adewumi O, Aflatoonian B, Ahrlund-Richter L, Amit M, Andrews PW, et al. (2007) Characterization of human embryonic stem cell lines by the International Stem Cell Initiative. *Nat Biotechnol* 25: 803-816.
40. Kouzarides T (2007) Chromatin modifications and their function. *Cell* 128: 693-705.
41. Zhou W, Zhu P, Wang J, Pascual G, Ohgi KA, et al. (2008) Histone H2A monoubiquitination represses transcription by inhibiting RNA polymerase II transcriptional elongation. *Mol Cell* 29: 69-80.
42. Choi HK, Kim BJ, Seo JH, Kang JS, Cho H, et al. (2010) Cohesion establishment factor, Eco1 represses transcription via association with histone demethylase, LSD1. *Biochemical and biophysical research communications* 394: 1063-1068.
43. Margueron R, Li G, Sarma K, Blais A, Zavadil J, et al. (2008) Ezh1 and Ezh2 maintain repressive chromatin through different mechanisms. *Mol Cell* 32: 503-518.
44. Shen X, Liu Y, Hsu YJ, Fujiwara Y, Kim J, et al. (2008) EZH1 mediates methylation on histone H3 lysine 27 and complements EZH2 in maintaining stem cell identity and executing pluripotency. *Mol Cell* 32: 491-502.
45. Sterner DE, Berger SL (2000) Acetylation of histones and transcription-related factors. *Microbiol Mol Biol Rev* 64: 435-459.
46. Gallinari P, Di Marco S, Jones P, Pallaoro M, Steinkuhler C (2007) HDACs, histone deacetylation and gene transcription: from molecular biology to cancer therapeutics. *Cell Res* 17: 195-211.
47. Hakimi MA, Bochar DA, Chenoweth J, Lane WS, Mandel G, et al. (2002) A core-BRAF35 complex containing histone deacetylase mediates repression of neuronal-specific genes. *Proc Natl Acad Sci U S A* 99: 7420-7425.
48. Soliman MA, Riabowol K (2007) After a decade of study-ING, a PHD for a versatile family of proteins. *Trends Biochem Sci* 32: 509-519.
49. Fazio TG, Huff JT, Panning B (2008) Chromatin regulation Tip(60)s the balance in embryonic stem cell self-renewal. *Cell Cycle* 7: 3302-3306.
50. Unoki M, Kumamoto K, Takenoshita S, Harris CC (2009) Reviewing the current classification of inhibitor of growth family proteins. *Cancer Sci* 100: 1173-1179.

51. Nottke A, Colaiacovo MP, Shi Y (2009) Developmental roles of the histone lysine demethylases. *Development* 136: 879-889.
52. Wang J, Scully K, Zhu X, Cai L, Zhang J, et al. (2007) Opposing LSD1 complexes function in developmental gene activation and repression programmes. *Nature* 446: 882-887.
53. Fei T, Xia K, Li Z, Zhou B, Zhu S, et al. Genome-wide mapping of SMAD target genes reveals the role of BMP signaling in embryonic stem cell fate determination. *Genome Res* 20: 36-44.
54. Clague MJ, Coulson JM, Urbe S (2008) Deciphering histone 2A deubiquitination. *Genome Biol* 9: 202.
55. Avvakumov N, Cote J (2007) The MYST family of histone acetyltransferases and their intimate links to cancer. *Oncogene* 26: 5395-5407.
56. Nishihara E, Moriya T, Shinohara K (2007) Expression of steroid receptor coactivator-1 is elevated during neuronal differentiation of murine neural stem cells. *Brain Res* 1135: 22-30.
57. Tetel MJ (2009) Nuclear receptor coactivators: essential players for steroid hormone action in the brain and in behaviour. *J Neuroendocrinol* 21: 229-237.
58. Feige E, Motro B (2002) The related murine kinases, Nek6 and Nek7, display distinct patterns of expression. *Mech Dev* 110: 219-223.
59. Kreis P, Barnier JV (2009) PAK signalling in neuronal physiology. *Cellular signalling* 21: 384-393.
60. Thompson M (2009) Polybromo-1: the chromatin targeting subunit of the PBAF complex. *Biochimie* 91: 309-319.
61. Kinkley S, Staeger H, Mohrmann G, Rohaly G, Schaub T, et al. (2009) SPOC1: a novel PHD-containing protein modulating chromatin structure and mitotic chromosome condensation. *Journal of cell science* 122: 2946-2956.
62. Shi YJ, Matson C, Lan F, Iwase S, Baba T, et al. (2005) Regulation of LSD1 histone demethylase activity by its associated factors. *Mol Cell* 19: 857-864.
63. Guccione E, Bassi C, Casadio F, Martinato F, Cesaroni M, et al. (2007) Methylation of histone H3R2 by PRMT6 and H3K4 by an MLL complex are mutually exclusive. *Nature*.
64. Isono K, Fujimura Y, Shinga J, Yamaki M, J OW, et al. (2005) Mammalian polyhomeotic homologues Phc2 and Phc1 act in synergy to mediate polycomb repression of Hox genes. *Mol Cell Biol* 25: 6694-6706.
65. Osley MA (2006) Regulation of histone H2A and H2B ubiquitylation. *Brief Funct Genomic Proteomic* 5: 179-189.
66. Sassone-Corsi P, Mizzen CA, Cheung P, Crosio C, Monaco L, et al. (1999) Requirement of Rsk-2 for epidermal growth factor-activated phosphorylation of histone H3. *Science* 285: 886-891.
67. Sun XJ, Wei J, Wu XY, Hu M, Wang L, et al. (2005) Identification and characterization of a novel human histone H3 lysine 36-specific methyltransferase. *J Biol Chem* 280: 35261-35271.
68. Huen MS, Sy SM, van Deursen JM, Chen J (2008) Direct interaction between SET8 and proliferating cell nuclear antigen couples H4-K20 methylation with DNA replication. *J Biol Chem* 283: 11073-11077.
69. Jiang Y, Jakovcevski M, Bharadwaj R, Connor C, Schroeder FA, et al. Setdb1 histone methyltransferase regulates mood-related behaviors and expression of the NMDA receptor subunit NR2B. *J Neurosci* 30: 7152-7167.
70. Ito S, D'Alessio AC, Taranova OV, Hong K, Sowers LC, et al. (2010) Role of Tet proteins in 5mC to 5hmC conversion, ES-cell self-renewal and inner cell mass specification. *Nature* 466: 1129-1133.
71. Hamamoto R, Furukawa Y, Morita M, Iimura Y, Silva FP, et al. (2004) SMYD3 encodes a histone methyltransferase involved in the proliferation of cancer cells. *Nat Cell Biol* 6: 731-740.
72. Cunliffe VT (2008) Eloquent silence: developmental functions of Class I histone deacetylases. *Current opinion in genetics & development* 18: 404-410.
73. Kim J, Guermah M, McGinty RK, Lee JS, Tang Z, et al. (2009) RAD6-Mediated transcription-coupled H2B ubiquitylation directly stimulates H3K4 methylation in human cells. *Cell* 137: 459-471.
74. Zhang XY, Varthi M, Sykes SM, Phillips C, Warzecha C, et al. (2008) The putative cancer stem cell marker USP22 is a subunit of the human SAGA complex required for activated transcription and cell-cycle progression. *Mol Cell* 29: 102-111.
75. Marango J, Shimoyama M, Nishio H, Meyer JA, Min DJ, et al. (2008) The MMSET protein is a histone methyltransferase with characteristics of a transcriptional corepressor. *Blood* 111: 3145-3154.
76. Nimura K, Ura K, Shiratori H, Ikawa M, Okabe M, et al. (2009) A histone H3 lysine 36 trimethyltransferase links Nkx2-5 to Wolf-Hirschhorn syndrome. *Nature* 460: 287-291.
