# Supplementary material for: Extensive Transcriptional Regulation of Chromatin Modifiers during Human Neurodevelopment
Source: PubMed Central journal article supplement (PMC3348879; doi:10.1371/journal.pone.0036708), 2012-05-09
Supplement: pone.0036708.s001.pdf [file pone.0036708.s001.pdf]

**Figure S1: Antibodies used for immunostaining and primers used for qPCR**

| Antigen                               | Antibody (supplier)             |          | Dilution | Species |
|---------------------------------------|---------------------------------|----------|----------|---------|
| <i>Antibodies for immuno staining</i> |                                 |          |          |         |
| Oct4                                  | anti-Oct4 (Santa Cruz)          | sc-5279  | 1:200    | mouse   |
| Nestin                                | anti-nestin (R&D Systems)       | MAB1259  | 1:200    | mouse   |
| CD57/HNK-1                            | anti-HNK-1 (Sigma)              | C6680    | 1:200    | mouse   |
| Pax6                                  | anti-Pax6 (Covance)             | PRB-278P | 1:200    | rabbit  |
| H3K9me3                               | anti-H3K9me3 (Millipore)        | 07-442   | 1:200    | rabbit  |
| H4K20me3                              | anti-H3K20me3 (Active Motif)    | 39181    | 1:200    | mouse   |
| <i>Antibodies for western blot</i>    |                                 |          |          |         |
| H3K9me3                               | anti-H3K9me3 (Millipore)        | 07-442   | 1:1000   | rabbit  |
| H3K36me2                              | anti-H3K36me2 (cell signalling) | 9758     | 1:1000   | rabbit  |
| H4K20me3                              | anti-H3K20me3 (Active Motif)    | 39181    | 1:1000   | mouse   |
| H3K27me3                              | anti-H3K27me3 (Millipore)       | 07-449   | 1:1000   | rabbit  |
| H3K4me3                               | anti-H3K4me3 (Active Motif)     | 39915    | 1:1000   | rabbit  |
| Pan-H3                                | anti-H3 (Abcam)                 | ab1791   | 1:5000   | rabbit  |
| <i>Antibodies for ChIP</i>            |                                 |          |          |         |
| H3K4me3                               | anti-H3K4me3 (Millipore)        | 17-614   |          | rabbit  |
| H3K27me3                              | anti-H3K27me3 (Active Motif)    | 39535    |          | rabbit  |

| Primer                                      | Sequence (5'→3')              | amplicon length (bp) |
|---------------------------------------------|-------------------------------|----------------------|
| <i>Primers for gene expression analysis</i> |                               |                      |
| BAF45A for                                  | CGAGGTGATGAGAAACGGAAAAATAAAGG | 194                  |
| BAF45A rev                                  | GGCTTGTAACCCAGGAAGTACTG       | 194                  |
| BAF53A for                                  | CAGGTCTCTATGGCAGTGTAAATAGTGGC | 190                  |
| BAF53A rev                                  | GTACCCAAAGAGGCTAGAATGGAG      | 190                  |
| BAF53B for                                  | TGATCGCAGCCAAGGAG             | 175                  |
| BAF53B rev                                  | GCAGCCACCTGTTTCATCGTAGG       | 175                  |
| BAF60A for                                  | CAGGGTTTCATCAATGACTGGCTTCAG   | 154                  |
| BAF60A rev                                  | GCACCTTGAGTAGAAGTATCGGCA      | 154                  |
| BAF60C for                                  | GGTGGAGGAGCCATTAAGGGG         | 189                  |
| BAF60C rev                                  | GAGCGGAGCAGGTCTGGAC           | 189                  |
| EZH1 for                                    | GCTTCCTTCACCCTTTTCATGCCACCC   | 163                  |
| EZH1 rev                                    | CGACGACCAGAGCACTTGGAG         | 163                  |
| TET1 for                                    | TGCCAACCTTAGGGAGTAACTG        | 172                  |
| TET1 rev                                    | GCAGTCTTCGGGGACCAGGA          | 172                  |
| TET2 for                                    | CCTATTGCTAAGTGGGTGGTTCGC      | 156                  |
| TET2 rev                                    | GTAGAGTTTGTGAGCCAGAGACAGC     | 156                  |
| <i>Primers for ChIP analysis</i>            |                               |                      |
| Oct4 for                                    | GAGGATGGCAAGCTGAGAAA          | 148                  |
| Oct4 rev                                    | CTCAATCCCAGGACAGAAC           | 148                  |
| Nanog for                                   | GTTCTGTTGCTCGGTTTTCT          | 95                   |
| Nanog rev                                   | TCCCGTCTACCAGTCTCACC          | 95                   |
| Pax6 for                                    | AAGGGAACCGTGGCTCGG            | 96                   |
| Pax6 rev                                    | ATTAGCGAAGCCTGACCTCTG         | 96                   |
| Sox2 for                                    | GCACCCACTGAAACTCTTC           | 130                  |
| Sox2 rev                                    | TGCAGGATCTCAGTGTTCG           | 130                  |
