# Supplementary material for: Extensive Transcriptional Regulation of Chromatin Modifiers during Human Neurodevelopment
Source: PubMed Central journal article supplement (PMC3348879; doi:10.1371/journal.pone.0036708), 2012-05-09
Supplement: pone.0036708.s002.pdf [file pone.0036708.s002.pdf]

**Figure S2: Neurodevelopmental genes examined in this study**

| Gene           | Description                                                                                                                                                                    | Ref  | Accession |
|----------------|--------------------------------------------------------------------------------------------------------------------------------------------------------------------------------|------|-----------|
| ACHE           | acetylcholinesterase                                                                                                                                                           | [1]  | NM_000665 |
| ADORA1         | adenosine receptor A1, belongs to the G-protein coupled receptor 1 family                                                                                                      | [2]  | NM_000674 |
| ADORA2A        | adenosine receptor A2a, belongs to the G-protein coupled receptor 1 family                                                                                                     | [2]  | NM_000675 |
| ALK            | receptor tyrosine kinase expressed specifically in the nervous system                                                                                                          | [3]  | NM_004304 |
| APBB1          | multimodular adaptor protein, binds to APP; required for synaptogenesis                                                                                                        | [4]  | NM_001164 |
| APOE           | apolipoprotein E; associated with Alzheimer's disease                                                                                                                          | [5]  | NM_000041 |
| ARNT2          | neuronal transcription factor, regulating cell cycle progression and preventing cell death                                                                                     | [6]  | NM_014862 |
| ARTN           | artemin; ligand for the RET receptor and uses GFR-alpha 3 as a coreceptor                                                                                                      | [7]  | NM_003976 |
| ASCL1 (MASH1)  | proneural transcription factor; dopaminergic differentiation                                                                                                                   | [8]  | NM_004316 |
| BAI1           | P53-target gene specifically expressed in the brain; expressed in neuronal cells of the cortex but not in astrocytes                                                           | [9]  | NM_001702 |
| BDNF           | brain-derived neurotrophic factor                                                                                                                                              | [10] | NM_001709 |
| BMP15          | member of the bone morphogenetic protein family which is part of the transforming growth factor-beta superfamily                                                               | [11] | NM_005448 |
| BMP2           | member of the bone morphogenetic protein family which is part of the transforming growth factor-beta superfamily                                                               | [12] | NM_001200 |
| BMP4           | member of the bone morphogenetic protein family which is part of the transforming growth factor-beta superfamily                                                               | [12] | NM_130851 |
| BMP8B          | member of the bone morphogenetic protein family which is part of the transforming growth factor-beta superfamily                                                               | [13] | NM_001720 |
| CDK5R1 (p35)   | activator of CDK5, which is involved in neuronal migration during CNS development, synaptic activity in matured neurons, and neuronal cell death in neurodegenerative diseases | [14] | NM_003885 |
| CDK5RAP1 (C42) | binds CDK5R1                                                                                                                                                                   | [15] | NM_016408 |
| CDK5RAP2 (C48) | binds CDK5R1                                                                                                                                                                   | [15] | NM_018249 |
| CDK5RAP3 (C53) | binds CDK5R1                                                                                                                                                                   | [15] | NM_176096 |
| CHRM2          | muscarinic cholinergic receptor                                                                                                                                                | [16] | NM_000739 |
| CXCL1          | C-X-C-motif chemokine 1                                                                                                                                                        | [17] | NM_001511 |
| DLG4 (PSD95)   | linked to NMDA receptors at synaptic sites, key role in mediating trafficking, clustering, and downstream signaling events, following receptor activation                      | [18] | NM_001365 |
| DLL1           | expression is found in mature DA neurons of the substantia nigra (SN) and ventral tegmental area (VTA); role in differentiation                                                | [19] | NM_005618 |
| DRD1           | dopamine receptor D1; expressed postsynaptically on dopamine target cells                                                                                                      | [20] | NM_000794 |

| Gene           | Description                                                                                                                                                          | Ref  | Accession |
|----------------|----------------------------------------------------------------------------------------------------------------------------------------------------------------------|------|-----------|
| DRD2           | dopamine receptor D2; expressed postsynaptically on dopamine target cells and presynaptically on dopaminergic neurons                                                | [20] | NM_000795 |
| DVL3           | axonal specification, neurite outgrowth                                                                                                                              | [21] | NM_004423 |
| EFNB1          | presynaptic development: Ephrin-B1 (EFNB1) and EFNB2 function with EphB to mediate presynaptic development via syntenin-1                                            | [22] | NM_004429 |
| EGF            | epidermal growth factor; involved in growth, proliferation and differentiation                                                                                       | [23] | NM_001963 |
| EP300          | histone acetyltransferase p300; regulates transcription via chromatin remodeling, important in the processes of cell proliferation and differentiation               | [24] | NM_001429 |
| ERBB2          | member of the epidermal growth factor (EGF) receptor family of receptor tyrosine kinases; roles in neuronal migration, axon guidance and synaptic plasticity         | [25] | NM_004448 |
| FEZ1           | interaction of FEZ1 with microtubules was shown to promote neurite extension                                                                                         | [26] | NM_005103 |
| FGF13          | fibroblast growth factor 13                                                                                                                                          | [27] | NM_004114 |
| FGF2 (BFGF)    | basic fibroblast growth factor                                                                                                                                       | [28] | NM_002006 |
| FLNA           | neuronal migration                                                                                                                                                   | [29] | NM_001456 |
| GDNF           | ability to promote survival of mesencephalic DA neurons                                                                                                              | [30] | NM_000514 |
| GNAO1          | guanine nucleotide-binding protein G(o) subunit alpha; involved in transmembrane signaling                                                                           | [31] | NM_020988 |
| GPI            | glucose-6-phosphate isomerase                                                                                                                                        | [32] | NM_000175 |
| GRIN1 (NMDAR1) | one of the major mediators of excitatory neurotransmission in the central nervous system                                                                             | [18] | NM_007327 |
| HDAC4          | histone deacetylation, class IIa HDAC, highly expressed in brain, can be neuroprotective                                                                             | [33] | NM_006037 |
| HDAC7          | histone deacetylation, class IIa HDAC, class IIa HDACs interact with the DNA-binding domains of MEF2 proteins and convert them from activators to repressors         | [34] | NM_016596 |
| HES1           | member of basic helix-loop-helix family of transcription factors; transcriptional repressor                                                                          | [35] | NM_005524 |
| HEY1           | member of the hairy and enhancer of split-related (HESR) family of basic helix-loop-helix (bHLH)-type transcriptional factors, Notch target gene, not neuro-specific | [35] | NM_012258 |
| HEY2           | member of the hairy and enhancer of split-related (HESR) family of basic helix-loop-helix (bHLH)-type transcriptional factors                                        | [35] | NM_012259 |
| HEYL (HEY3)    | member of the hairy and enhancer of split-related (HESR) family of basic helix-loop-helix (bHLH)-type transcription factors                                          | [35] | NM_014571 |
| IL3            | interleukin 3; growth promoting cytokine                                                                                                                             | [36] | NM_000588 |
| INHBA          | inhibin beta A                                                                                                                                                       | [37] | NM_002192 |
| MDK            | mouse: promotes survival of mesencephalic neurons in culture, might have ubiquitous neurotrophic effect on DA neurons                                                | [38] | NM_002391 |
| MEF2C          | mouse: mef2 genes appear to be associated with withdrawal of neurons from cell cycle and expression of a differentiated phenotype                                    | [39] | NM_002397 |
| MLL            | histone methyltransferase; neuronal differentiation                                                                                                                  | [40] | NM_005933 |

| Gene           | Description                                                                                                                                                                     | Ref        | Accession |
|----------------|---------------------------------------------------------------------------------------------------------------------------------------------------------------------------------|------------|-----------|
| NCOA6          | potential to enhance the activity of various transcription factors; could modulate chromatin structure by recruiting factors with HAT activity to the promoter (e.g., CBP/p300) | [41]       | NM_014071 |
| NDN            | expressed in post-mitotic neurons; binds to ARNT2                                                                                                                               | [42]       | NM_002487 |
| NDP            | Norrie disease protein; activates Wnt pathway, mutations lead to Norrie disease, expressed in the neural tube in mice                                                           | [43,44]    | NM_000266 |
| NEUROD1        | proneural basic helix-loop-helix transcription factor that is essential for the development of the CNS; neuronal differentiation                                                | [45]       | NM_002500 |
| NOG            | important for specification of midbrain DA neurons and may be necessary for their long-term survival                                                                            | [46]       | NM_005450 |
| NOTCH2         | role in a various developmental processes, controlling cell fate decisions                                                                                                      | [47]       | NM_024408 |
| NPTX1          | synaptogenic activity; constitutively expressed in adult neurons and can form small cell surface clusters that can cocluster AMPA receptors                                     | [48]       | NM_002522 |
| NRCAM          | expressed by ventro-mesencephalic DA neurons; co-receptor for NRP2, also required for full manifestation of the repulsive effect of Sema3B and 3F                               | [49]       | NM_005010 |
| NRG1           | major role in neural, mammary and cardiac development; axonally derived NRG1 binds to erbb2 receptors expressed on Schwann cells                                                | [50]       | NM_013957 |
| NRP1           | Sema3A receptor; neuronal cell guidance and axonal growth during the development of the nervous system                                                                          | [51]       | NM_003873 |
| NRP2           | Sema3F receptor; expressed in the ventral mesencephalon and ventro-mesencephalic DA neurons during development and in the adult brain                                           | [49]       | NM_003872 |
| NTN1           | axon guidance                                                                                                                                                                   | [52]       | NM_004822 |
| ODZ1           | odd Oz/ten-m homolog 1; cellular signal transducer                                                                                                                              | [53]       | NM_014253 |
| PAFAH1B1       | influences microtubule function                                                                                                                                                 | [54]       | NM_000430 |
| PARD3 (PAR3)   | part of a protein complex that includes Par6, atypical protein kinases C and the Cdc42 GTPase                                                                                   | [55]       | NM_019619 |
| PARD6B (PAR6B) | part of a protein complex that includes Par3, atypical protein kinases C and the Cdc42 GTPase, regulates cell polarity in different cell types.                                 | [55,56,57] | NM_032521 |
| PAX3           | member of the paired box (PAX) family of transcription factors; neural stem cell marker                                                                                         | [58]       | NM_181461 |
| PAX5           | member of the paired box (PAX) family of transcription factors                                                                                                                  | [59]       | NM_016734 |
| PAX6           | member of the paired box (PAX) family of transcription factors; neural stem cell marker                                                                                         | [58,60]    | NM_000280 |
| POU3F3 (BRN1)  | transcription factor, expressed in CNS                                                                                                                                          | [61]       | NM_006236 |
| POU4F1 (BRN3A) | transcription factor, also found in subpopulations of DA neurons or in DA neuron region                                                                                         | [62]       | NM_006237 |
| PTN            | pleiotrophin; neurite outgrowth promotin activity                                                                                                                               | [63]       | NM_002825 |
| RAC1           | promotes cell spreading, lamellopodia formation and neurite outgrowth                                                                                                           | [64]       | NM_006908 |
| ROBO1          | axon guidance; rat: in developing and adult mdDA neurons, expressed in neurons throughout the SN and VTA                                                                        | [52]       | NM_002941 |
| RTN4 (NOGO)    | inhibitor of neurite outgrowth; involvement in restricting the plasticity of the CNS                                                                                            | [65]       | NM_007008 |

| Gene               | Description                                                                                                                                                               | Ref     | Accession |
|--------------------|---------------------------------------------------------------------------------------------------------------------------------------------------------------------------|---------|-----------|
| S100A6             | binds calcium; found in subpopulations of neurons and astrocytes                                                                                                          | [66]    | NM_014624 |
| S100B              | S100 calcium binding protein B                                                                                                                                            | [67]    | NM_006272 |
| SEMA4D             | semaphorin 4D; transmembrane protein, axon guidance                                                                                                                       | [68]    | NM_006378 |
| SHH                | morphogen, expressed in midbrain regions, required for proper development of mdDA neurons                                                                                 | [69]    | NM_000193 |
| SLIT2              | axon guidance; rat: SLIT2 is expressed in adult SN neurons only                                                                                                           | [52,69] | NM_004787 |
| SOX8               | transcription factor, regulation of embryonic development and in the determination of the cell fate                                                                       | [70]    | NM_014587 |
| STAT3              | signal transducer and activator of transcription 3 ; transcription factor                                                                                                 | [71]    | NM_003150 |
| TNR                | extracellular matrix protein, primarily expressed in the central nervous system                                                                                           | [72]    | NM_003285 |
| VEGFA              | isoform VEGF165 binds to both NRP1 and NRP2                                                                                                                               | [73]    | NM_003376 |
| YWHAH (14-3-3 eta) | most abundantly expressed in brain; putative functions: cell survival, signaling, cell growth, division, adhesion, differentiation, apoptosis, regulation of ion channels | [74]    | NM_003405 |

## References

- Soreq H, Seidman S (2001) Acetylcholinesterase--new roles for an old actor. *Nature reviews Neuroscience* 2: 294-302.
- Libert F, Passage E, Parmentier M, Simons MJ, Vassart G, et al. (1991) Chromosomal mapping of A1 and A2 adenosine receptors, VIP receptor, and a new subtype of serotonin receptor. *Genomics* 11: 225-227.
- Iwahara T, Fujimoto J, Wen D, Cupples R, Bucay N, et al. (1997) Molecular characterization of ALK, a receptor tyrosine kinase expressed specifically in the nervous system. *Oncogene* 14: 439-449.
- Kesavapany S, Banner SJ, Lau KF, Shaw CE, Miller CC, et al. (2002) Expression of the Fe65 adapter protein in adult and developing mouse brain. *Neuroscience* 115: 951-960.
- Saunders AM, Strittmatter WJ, Schmechel D, George-Hyslop PH, Pericak-Vance MA, et al. (1993) Association of apolipoprotein E allele epsilon4 with late-onset familial and sporadic Alzheimer's disease. *Neurology* 43: 1467-1472.
- Drutel G, Heron A, Kathmann M, Gros C, Mace S, et al. (1999) ARNT2, a transcription factor for brain neuron survival? *The European journal of neuroscience* 11: 1545-1553.
- Baloh RH, Tansey MG, Lampe PA, Fahrner TJ, Enomoto H, et al. (1998) Artemin, a novel member of the GDNF ligand family, supports peripheral and central neurons and signals through the GFRalpha3-RET receptor complex. *Neuron* 21: 1291-1302.
- Villa A, Liste I, Courtois ET, Seiz EG, Ramos M, et al. (2009) Generation and properties of a new human ventral mesencephalic neural stem cell line. *Experimental cell research* 315: 1860-1874.
- Mori K, Kanemura Y, Fujikawa H, Nakano A, Ikemoto H, et al. (2002) Brain-specific angiogenesis inhibitor 1 (BAI1) is expressed in human cerebral neuronal cells. *Neuroscience research* 43: 69-74.
- Martin JL, Finsterwald C (2011) Cooperation between BDNF and glutamate in the regulation of synaptic transmission and neuronal development. *Communicative & integrative biology* 4: 14-16.
- Di Pasquale E, Brivanlou AH (2009) Bone morphogenetic protein 15 (BMP15) acts as a BMP and Wnt inhibitor during early embryogenesis. *The Journal of biological chemistry* 284: 26127-26136.
- Lu HZ, Hu JG (2009) Expression of bone morphogenetic proteins-2/4 in neural stem cells and their lineages. *Acta neurobiologiae experimentalis* 69: 441-447.
- Kee K, Gonsalves JM, Clark AT, Pera RA (2006) Bone morphogenetic proteins induce germ cell differentiation from human embryonic stem cells. *Stem cells and development* 15: 831-837.
- Endo R, Saito T, Asada A, Kawahara H, Ohshima T, et al. (2009) Commitment of 1-methyl-4-phenylpyridinium ion-induced neuronal cell death by proteasome-mediated degradation of p35 cyclin-dependent kinase 5 activator. *The Journal of biological chemistry* 284: 26029-26039.
- Wang X, Ching YP, Lam WH, Qi Z, Zhang M, et al. (2000) Identification of a common protein association region in the neuronal Cdk5 activator. *The Journal of biological chemistry* 275: 31763-31769.
- Gibbons AS, Scarr E, McLean C, Sundram S, Dean B (2009) Decreased muscarinic receptor binding in the frontal cortex of bipolar disorder and major depressive disorder subjects. *Journal of affective disorders* 116: 184-191.
- Edman LC, Mira H, Ericas A, Malmersjo S, Andersson E, et al. (2008) Alpha-chemokines regulate proliferation, neurogenesis, and dopaminergic differentiation of ventral midbrain precursors and neurospheres. *Stem Cells* 26: 1891-1900.
- Feyissa AM, Chandran A, Stockmeier CA, Karolewicz B (2009) Reduced levels of NR2A and NR2B subunits of NMDA receptor and PSD-95 in the prefrontal cortex in major depression. *Progress in neuro-psychopharmacology & biological psychiatry* 33: 70-75.
- Bauer M, Szulc J, Meyer M, Jensen CH, Terki TA, et al. (2008) Delta-like 1 participates in the specification of ventral midbrain progenitor derived dopaminergic neurons. *Journal of neurochemistry* 104: 1101-1115.
- Beaulieu JM, Gainetdinov RR (2011) The physiology, signaling, and pharmacology of dopamine receptors. *Pharmacological reviews* 63: 182-217.
- Endo Y, Beauchamp E, Woods D, Taylor WG, Toretzky JA, et al. (2008) Wnt-3a and Dickkopf-1 stimulate neurite outgrowth in Ewing tumor cells via a Frizzled3- and c-Jun N-terminal kinase-dependent mechanism. *Molecular and cellular biology* 28: 2368-2379.

22. McClelland AC, Sheffler-Collins SI, Kayser MS, Dalva MB (2009) Ephrin-B1 and ephrin-B2 mediate EphB-dependent presynaptic development via syntenin-1. *Proceedings of the National Academy of Sciences of the United States of America* 106: 20487-20492.
23. Gadadhar A, Marr R, Lazarov O (2011) Presenilin-1 regulates neural progenitor cell differentiation in the adult brain. *The Journal of neuroscience : the official journal of the Society for Neuroscience* 31: 2615-2623.
24. Francis YI, Diss JK, Kariti M, Stephanou A, Latchman DS (2007) p300 activation by Presenilin 1 but not by its M146L mutant. *Neuroscience letters* 413: 137-140.
25. Chen Y, Fu AK, Ip NY (2008) Bidirectional signaling of ErbB and Eph receptors at synapses. *Neuron glia biology* 4: 211-221.
26. Haedicke J, Brown C, Naghavi MH (2009) The brain-specific factor FEZ1 is a determinant of neuronal susceptibility to HIV-1 infection. *Proceedings of the National Academy of Sciences of the United States of America* 106: 14040-14045.
27. Greene JM, Li YL, Yourey PA, Gruber J, Carter KC, et al. (1998) Identification and characterization of a novel member of the fibroblast growth factor family. *The European journal of neuroscience* 10: 1911-1925.
28. Mudo G, Bonomo A, Di Liberto V, Frinchi M, Fuxe K, et al. (2009) The FGF-2/FGFRs neurotrophic system promotes neurogenesis in the adult brain. *Journal of neural transmission* 116: 995-1005.
29. Robertson SP (2005) Filamin A: phenotypic diversity. *Current opinion in genetics & development* 15: 301-307.
30. Kriegstein K (2004) Factors promoting survival of mesencephalic dopaminergic neurons. *Cell and tissue research* 318: 73-80.
31. Lang JC, Costa T (1989) Distribution of the alpha-subunit of the guanine nucleotide-binding protein Gi2 and its comparison to G alpha o. *Journal of receptor research* 9: 313-329.
32. Kim JW, Dang CV (2005) Multifaceted roles of glycolytic enzymes. *Trends in biochemical sciences* 30: 142-150.
33. Majdzadeh N, Wang L, Morrison BE, Bassel-Duby R, Olson EN, et al. (2008) HDAC4 inhibits cell-cycle progression and protects neurons from cell death. *Developmental neurobiology* 68: 1076-1092.
34. Gregoire S, Yang XJ (2005) Association with class IIa histone deacetylases upregulates the sumoylation of MEF2 transcription factors. *Molecular and cellular biology* 25: 2273-2287.
35. Katoh M (2007) Integrative genomic analyses on HES/HEY family: Notch-independent HES1, HES3 transcription in undifferentiated ES cells, and Notch-dependent HES1, HES5, HEY1, HEY2, HEYL transcription in fetal tissues, adult tissues, or cancer. *International journal of oncology* 31: 461-466.
36. Zhao B, Schwartz JP (1998) Involvement of cytokines in normal CNS development and neurological diseases: recent progress and perspectives. *Journal of neuroscience research* 52: 7-16.
37. Zhang SJ, Zou M, Lu L, Lau D, Ditzel DA, et al. (2009) Nuclear calcium signaling controls expression of a large gene pool: identification of a gene program for acquired neuroprotection induced by synaptic activity. *PLoS genetics* 5: e1000604.
38. Ohgake S, Shimizu E, Hashimoto K, Okamura N, Koike K, et al. (2009) Dopaminergic hypofunctions and prepulse inhibition deficits in mice lacking midline. *Progress in neuro-psychopharmacology & biological psychiatry* 33: 541-546.
39. Lyons GE, Micales BK, Schwarz J, Martin JF, Olson EN (1995) Expression of mef2 genes in the mouse central nervous system suggests a role in neuronal maturation. *The Journal of neuroscience : the official journal of the Society for Neuroscience* 15: 5727-5738.
40. Lim DA, Huang YC, Swigut T, Mirick AL, Garcia-Verdugo JM, et al. (2009) Chromatin remodelling factor Mll1 is essential for neurogenesis from postnatal neural stem cells. *Nature* 458: 529-533.
41. Mahajan MA, Samuels HH (2008) Nuclear receptor coactivator/coregulator NCoA6(NRC) is a pleiotropic coregulator involved in transcription, cell survival, growth and development. *Nuclear receptor signaling* 6: e002.
42. Friedman ER, Fan CM (2007) Separate necdin domains bind ARNT2 and HIF1alpha and repress transcription. *Biochemical and biophysical research communications* 363: 113-118.
43. Warden SM, Andreoli CM, Mukai S (2007) The Wnt signaling pathway in familial exudative vitreoretinopathy and Norrie disease. *Seminars in ophthalmology* 22: 211-217.
44. Ye X, Smallwood P, Nathans J (2011) Expression of the Norrie disease gene (Ndp) in developing and adult mouse eye, ear, and brain. *Gene expression patterns : GEP* 11: 151-155.
45. Kuwabara T, Hsieh J, Muotri A, Yeo G, Warashina M, et al. (2009) Wnt-mediated activation of NeuroD1 and retro-elements during adult neurogenesis. *Nature neuroscience* 12: 1097-1105.
46. Chiba S, Lee YM, Zhou W, Freed CR (2008) Noggin enhances dopamine neuron production from human embryonic stem cells and improves behavioral outcome after transplantation into Parkinsonian rats. *Stem Cells* 26: 2810-2820.
47. Louvi A, Artavanis-Tsakonas S (2006) Notch signalling in vertebrate neural development. *Nature reviews Neuroscience* 7: 93-102.
48. Xu D, Hopf C, Reddy R, Cho RW, Guo L, et al. (2003) Narp and NP1 form heterocomplexes that function in developmental and activity-dependent synaptic plasticity. *Neuron* 39: 513-528.
49. Torre ER, Gutekunst CA, Gross RE (2010) Expression by midbrain dopamine neurons of Sema3A and 3F receptors is associated with chemorepulsion in vitro but a mild in vivo phenotype. *Molecular and cellular neurosciences* 44: 135-153.
50. Fricker FR, Zhu N, Tsantoulas C, Abrahamsen B, Nassar MA, et al. (2009) Sensory axon-derived neuregulin-1 is required for axoglial signaling and normal sensory function but not for long-term axon maintenance. *The Journal of neuroscience : the official journal of the Society for Neuroscience* 29: 7667-7678.
51. Hermanson E, Borgius L, Bergslund M, Joodmardi E, Perlmann T (2006) Neuropilin1 is a direct downstream target of Nurr1 in the developing brain stem. *Journal of neurochemistry* 97: 1403-1411.
52. Smidt MP, Burbach JP (2007) How to make a mesodiencephalic dopaminergic neuron. *Nature reviews Neuroscience* 8: 21-32.
53. Ben-Zur T, Feige E, Motro B, Wides R (2000) The mammalian Odz gene family: homologs of a Drosophila pair-rule gene with expression implying distinct yet overlapping developmental roles. *Developmental biology* 217: 107-120.
54. Keays DA (2007) Neuronal migration: unraveling the molecular pathway with humans, mice, and a fungus. *Mammalian genome : official journal of the International Mammalian Genome Society* 18: 425-430.
55. Gao L, Macara IG, Joberty G (2002) Multiple splice variants of Par3 and of a novel related gene, Par3L, produce proteins with different binding properties. *Gene* 294: 99-107.
56. Alarcon VB (2010) Cell polarity regulator PARD6B is essential for trophectoderm formation in the preimplantation mouse embryo. *Biology of reproduction* 83: 347-358.
57. Durgan J, Kaji N, Jin D, Hall A (2011) Par6B and Atypical PKC Regulate Mitotic Spindle Orientation during Epithelial Morphogenesis. *The Journal of biological chemistry* 286: 12461-12474.
58. Kuegler PB, Zimmer B, Waldmann T, Baudis B, Ilmjarv S, et al. (2010) Markers of murine embryonic and neural stem cells, neurons and astrocytes: reference points for developmental neurotoxicity testing. *ALTEX* 27: 17-42.
59. Simon HH, Bhatt L, Gherbassi D, Sgado P, Alberi L (2003) Midbrain dopaminergic neurons: determination of their developmental fate by transcription factors. *Annals of the New York Academy of Sciences* 991: 36-47.
60. Li XJ, Du ZW, Zarnowska ED, Pankratz M, Hansen LO, et al. (2005) Specification of motoneurons from human embryonic stem cells. *Nature biotechnology* 23: 215-221.
61. Jin Z, Liu L, Bian W, Chen Y, Xu G, et al. (2009) Different transcription factors regulate nestin gene expression during P19 cell neural differentiation and central nervous system development. *The Journal of biological chemistry* 284: 8160-8173.
62. Nelander J, Hebsgaard JB, Parmar M (2009) Organization of the human embryonic ventral mesencephalon. *Gene expression patterns : GEP* 9: 555-561.

63. Landgraf P, Wahle P, Pape HC, Gundelfinger ED, Kreutz MR (2008) The survival-promoting peptide Y-P30 enhances binding of pleiotrophin to syndecan-2 and -3 and supports its neurotogenic activity. *The Journal of biological chemistry* 283: 25036-25045.
64. Hajdo-Milasinovic A, van der Kammen RA, Moneva Z, Collard JG (2009) Rac3 inhibits adhesion and differentiation of neuronal cells by modifying GIT1 downstream signaling. *Journal of cell science* 122: 2127-2136.
65. Oertle T, Schwab ME (2003) Nogo and its paRTNers. *Trends in cell biology* 13: 187-194.
66. Yamashita N, Ilg EC, Schafer BW, Heizmann CW, Kosaka T (1999) Distribution of a specific calcium-binding protein of the S100 protein family, S100A6 (calcyclin), in subpopulations of neurons and glial cells of the adult rat nervous system. *The Journal of comparative neurology* 404: 235-257.
67. Villarreal A, Aviles Reyes RX, Angelo MF, Reines AG, Ramos AJ (2011) S100B alters neuronal survival and dendrite extension via RAGE-mediated NF-kappaB signaling. *Journal of neurochemistry* 117: 321-332.
68. Vodrazka P, Korostylev A, Hirschberg A, Swiercz JM, Worzfeld T, et al. (2009) The semaphorin 4D-plexin-B signalling complex regulates dendritic and axonal complexity in developing neurons via diverse pathways. *The European journal of neuroscience* 30: 1193-1208.
69. Van den Heuvel DM, Pasterkamp RJ (2008) Getting connected in the dopamine system. *Progress in neurobiology* 85: 75-93.
70. Stolt CC, Wegner M (2010) SoxE function in vertebrate nervous system development. *The international journal of biochemistry & cell biology* 42: 437-440.
71. Snyder M, Huang XY, Zhang JJ (2011) Stat3 is essential for neuronal differentiation through direct transcriptional regulation of the Sox6 gene. *FEBS letters* 585: 148-152.
72. El Ayachi I, Fernandez C, Baeza N, De Paula AM, Pesheva P, et al. (2011) Spatiotemporal distribution of tenascin-R in the developing human cerebral cortex parallels neuronal migration. *The Journal of comparative neurology* 519: 2379-2389.
73. Pellet-Many C, Frankel P, Jia H, Zachary I (2008) Neuropilins: structure, function and role in disease. *The Biochemical journal* 411: 211-226.
74. Anantharam V, Lehrmann E, Kanthasamy A, Yang Y, Banerjee P, et al. (2007) Microarray analysis of oxidative stress regulated genes in mesencephalic dopaminergic neuronal cells: relevance to oxidative damage in Parkinson's disease. *Neurochemistry international* 50: 834-847.
