# Supplementary material for: Extensive Transcriptional Regulation of Chromatin Modifiers during Human Neurodevelopment
Source: PubMed Central journal article supplement (PMC3348879; doi:10.1371/journal.pone.0036708), 2012-05-09
Supplement: pone.0036708.s003.pdf [file pone.0036708.s003.pdf]

**Figure S3: Expression of neuro-developmental genes in NEP and NCP**

| Gene     | rel. Expression NEP | SD    | FDR corr. p-value | rel. Expression NCP | SD   | FDR corr.p-value |
|----------|---------------------|-------|-------------------|---------------------|------|------------------|
| ACHE     | 2.16                | 0.73  | 0.07              | 0.75                | 0.11 | 0.19             |
| ADORA1   | 3.26                | 3.98  | 0.38              | 1.74                | 0.50 | 0.11             |
| ADORA2A  | 1.31                | 0.17  | 0.06              | 0.16                | 0.08 | 0.04             |
| ALK      | 22.79               | 4.33  | 0.04              | 11.72               | 7.07 | 0.04             |
| APBB1    | 2.83                | 0.62  | 0.02              | 1.77                | 0.15 | 0.05             |
| APOE     | 0.93                | 0.20  | 0.64              | 0.10                | 0.04 | 0.02             |
| ARNT2    | 6.95                | 1.71  | 0.02              | 4.05                | 0.51 | 0.04             |
| ARTN     | 0.40                | 0.03  | 0.02              | 0.05                | 0.02 | 0.02             |
| ASCL1    | 5.70                | 3.70  | 0.10              | 0.06                | 0.01 | 0.02             |
| BAI1     | 2.42                | 0.83  | 0.04              | 1.18                | 0.72 | 0.94             |
| BDNF     | 1.05                | 0.46  | 0.85              | 9.17                | 1.70 | 0.04             |
| BMP15    | 5.08                | 3.15  | 0.03              | 2.52                | 2.63 | 0.66             |
| BMP2     | 1.67                | 0.66  | 0.34              | 0.15                | 0.03 | 0.04             |
| BMP4     | 9.99                | 6.77  | 0.04              | 3.21                | 1.19 | 0.04             |
| BMP8B    | 6.53                | 2.29  | 0.03              | 1.04                | 0.88 | 0.73             |
| CDK5R1   | 1.88                | 0.53  | 0.06              | 0.45                | 0.04 | 0.02             |
| CDK5RAP1 | 2.50                | 0.98  | 0.07              | 0.75                | 0.11 | 0.31             |
| CDK5RAP2 | 3.22                | 0.18  | 0.02              | 1.92                | 0.21 | 0.02             |
| CDK5RAP3 | 3.12                | 1.27  | 0.04              | 1.12                | 0.23 | 0.57             |
| CHRM2    | 1.60                | 0.36  | 0.69              | 2.63                | 0.95 | 0.23             |
| CXCL1    | 0.40                | 0.19  | 0.05              | 0.07                | 0.02 | 0.01             |
| DLG4     | 2.98                | 0.74  | 0.03              | 2.83                | 0.62 | 0.03             |
| DLL1     | 30.58               | 17.04 | 0.02              | 0.04                | 0.02 | 0.02             |
| DRD1     | 1.17                | 0.25  | 0.78              | 0.93                | 0.26 | 0.89             |
| DRD2     | 16.90               | 15.67 | 0.15              | 0.54                | 0.26 | 0.12             |
| DVL3     | 2.38                | 0.56  | 0.04              | 2.19                | 0.37 | 0.03             |
| EFNB1    | 15.00               | 4.39  | 0.02              | 37.46               | 7.80 | 0.00             |
| EGF      | 8.15                | 5.26  | 0.09              | 1.22                | 0.25 | 0.71             |
| EP300    | 1.85                | 0.40  | 0.04              | 0.97                | 0.14 | 0.80             |
| ERBB2    | 0.90                | 0.09  | 0.47              | 0.97                | 0.18 | 0.81             |
| FEZ1     | 2.12                | 1.44  | 0.26              | 1.01                | 0.10 | 0.97             |
| FGF13    | 1.88                | 0.05  | 0.04              | 0.48                | 0.22 | 0.07             |
| FGF2     | 0.64                | 0.21  | 0.05              | 0.13                | 0.03 | 0.02             |
| FLNA     | 1.32                | 0.42  | 0.29              | 1.80                | 0.38 | 0.04             |
| GDNF     | 3.17                | 1.28  | 0.06              | 0.57                | 0.23 | 0.19             |
| GNAO1    | 0.49                | 0.09  | 0.02              | 0.02                | 0.01 | 0.02             |
| GPI      | 0.55                | 0.07  | 0.09              | 0.48                | 0.13 | 0.08             |
| GRIN1    | 0.57                | 0.19  | 0.07              | 0.04                | 0.04 | 0.04             |
| HDAC4    | 1.94                | 0.44  | 0.04              | 0.94                | 0.20 | 0.62             |
| HDAC7    | 1.54                | 0.48  | 0.77              | 2.28                | 0.34 | 0.25             |
| HES1     | 1.24                | 0.66  | 0.57              | 0.48                | 0.24 | 0.11             |
| HEY1     | 16.03               | 3.31  | 0.01              | 0.34                | 0.18 | 0.08             |
| HEY2     | 0.79                | 0.80  | 0.68              | 0.11                | 0.08 | 0.42             |
| HEYL     | 6.08                | 2.58  | 0.04              | 0.59                | 0.16 | 0.05             |
| IL3      | 1.05                | 0.21  | 0.68              | 0.85                | 0.27 | 0.96             |
| INHBA    | 0.53                | 0.15  | 0.18              | 1.87                | 0.66 | 0.24             |
| MDK      | 4.29                | 2.09  | 0.04              | 1.01                | 0.28 | 0.04             |

|          |        |        |      |       |       |      |
|----------|--------|--------|------|-------|-------|------|
| MEF2C    | 1.05   | 0.20   | 0.92 | 1.65  | 0.69  | 0.92 |
| MLL      | 2.88   | 1.26   | 0.07 | 1.13  | 0.13  | 0.10 |
| NCOA6    | 9.21   | 0.84   | 0.00 | 6.65  | 1.13  | 0.00 |
| NDN      | 5.17   | 0.70   | 0.04 | 11.45 | 3.61  | 0.04 |
| NDP      | 12.29  | 5.03   | 0.02 | 1.86  | 1.74  | 0.06 |
| NEUROD1  | 279.50 | 200.08 | 0.02 | 0.09  | 0.02  | 0.02 |
| NOG      | 12.88  | 11.90  | 0.16 | 0.45  | 0.14  | 0.06 |
| NOTCH2   | 5.37   | 2.55   | 0.04 | 7.16  | 1.44  | 0.04 |
| NPTX1    | 0.09   | 0.01   | 0.02 | 0.02  | 0.01  | 0.02 |
| NRCAM    | 10.54  | 4.55   | 0.03 | 3.50  | 2.03  | 0.03 |
| NRG1     | 9.75   | 0.16   | 0.04 | 1.05  | 0.33  | 0.04 |
| NRP1     | 5.43   | 3.03   | 0.03 | 54.04 | 1.13  | 0.04 |
| NRP2     | 5.52   | 3.71   | 0.04 | 1.87  | 0.26  | 0.04 |
| NTN1     | 2.63   | 0.68   | 0.06 | 1.83  | 0.32  | 0.13 |
| ODZ1     | 2.89   | 2.19   | 0.25 | 7.38  | 2.54  | 0.19 |
| PAFAH1B1 | 2.83   | 0.85   | 0.04 | 1.58  | 0.04  | 0.04 |
| PARD3    | 1.29   | 0.20   | 0.10 | 1.49  | 0.35  | 0.14 |
| PARD6B   | 3.61   | 1.98   | 0.09 | 0.01  | 0.00  | 0.06 |
| PAX3     | 180.59 | 88.11  | 0.01 | 26.65 | 4.39  | 0.01 |
| PAX5     | 1.15   | 0.26   | 1.00 | 0.83  | 0.44  | 0.78 |
| PAX6     | 562.49 | 264.06 | 0.01 | 0.74  | 0.39  | 0.02 |
| POU3F3   | 9.91   | 3.39   | 0.02 | 6.65  | 2.77  | 0.02 |
| POU4F1   | 9.86   | 13.78  | 0.33 | 0.05  | 0.02  | 0.24 |
| PTN      | 4.57   | 1.18   | 0.02 | 83.14 | 39.00 | 0.02 |
| RAC1     | 2.10   | 0.42   | 0.04 | 2.14  | 0.18  | 0.04 |
| ROBO1    | 3.11   | 0.73   | 0.03 | 11.41 | 2.25  | 0.03 |
| RTN4     | 1.12   | 0.27   | 0.50 | 1.46  | 0.60  | 0.62 |
| S100A6   | 6.00   | 4.19   | 0.11 | 1.46  | 0.36  | 0.06 |
| S100B    | 1.31   | 0.18   | 0.91 | 30.76 | 19.64 | 0.62 |
| SEMA4D   | 1.18   | 0.20   | 0.27 | 0.05  | 0.01  | 0.28 |
| SHH      | 4.60   | 5.44   | 0.46 | 0.47  | 0.06  | 0.54 |
| SLIT2    | 59.68  | 45.12  | 0.02 | 46.89 | 8.97  | 0.02 |
| SOX8     | 1.54   | 0.39   | 0.09 | 1.95  | 0.74  | 0.13 |
| STAT3    | 1.68   | 0.61   | 0.13 | 2.57  | 0.26  | 0.20 |
| TNR      | 1.21   | 0.46   | 0.63 | 0.82  | 0.33  | 0.88 |
| VEGFA    | 2.25   | 1.92   | 0.33 | 2.43  | 0.57  | 0.43 |
| YWHAH    | 1.01   | 0.32   | 0.93 | 0.69  | 0.25  | 0.92 |
