# Supplementary material for: Extensive Transcriptional Regulation of Chromatin Modifiers during Human Neurodevelopment
Source: PubMed Central journal article supplement (PMC3348879; doi:10.1371/journal.pone.0036708), 2012-05-09
Supplement: pone.0036708.s005.pdf [file pone.0036708.s005.pdf]

**Figure S5: Expression of epigenetic regulators normalized to hESC**

| Gene   | rel. expr. NEP | SD  | FDR corr. p-value | rel. expr. NCP | SD  | FDR corr. p-value | rel. expr. Ctx | SD    | FDR corr. p-value |
|--------|----------------|-----|-------------------|----------------|-----|-------------------|----------------|-------|-------------------|
| ARID1A | 3.1            | 0.4 | 0.022             | 1.1            | 0.6 | 0.912             | 1.4            | 1.0   | 0.709             |
| ASH1L  | 3.2            | 0.6 | 0.022             | 3.2            | 0.9 | 0.031             | 13.3           | 4.5   | 0.015             |
| ASXL1  | 13.8           | 0.8 | 0.000             | 7.1            | 2.7 | 0.032             | 24.8           | 5.2   | 0.008             |
| ATF2   | 3.2            | 0.6 | 0.021             | 1.7            | 0.7 | 0.201             | 8.4            | 0.9   | 0.000             |
| AURKA  | 1.2            | 0.1 | 0.159             | 0.5            | 0.2 | 0.073             | 0.5            | 0.1   | 0.051             |
| AURKB  | 1.2            | 0.3 | 0.370             | 0.4            | 0.2 | 0.081             | 0.0            | 0.0   | 0.010             |
| AURKC  | 2.4            | 0.9 | 0.075             | 0.4            | 0.2 | 0.090             | 1.3            | 0.7   | 0.614             |
| BAF45A | 2.5            | 1.5 | 0.106             | 1.6            | 0.9 | 0.404             | 13.5           | 4.7   | 0.010             |
| BAF53A | 1.1            | 0.6 | 0.939             | 0.8            | 0.4 | 0.438             | 19.2           | 10.9  | 0.024             |
| BAF53B | 7.6            | 9.1 | 0.155             | 5.3            | 4.2 | 0.341             | 576.7          | 331.6 | 0.013             |
| BAF60A | 1.5            | 0.6 | 0.291             | 1.0            | 0.5 | 0.695             | 2.6            | 0.6   | 0.029             |
| BAF60C | 5.1            | 1.9 | 0.036             | 10.8           | 8.3 | 0.042             | 495.4          | 116.2 | 0.010             |
| BAZ1A  | 3.6            | 0.6 | 0.021             | 2.4            | 0.4 | 0.032             | 6.1            | 2.9   | 0.029             |
| BAZ1B  | 2.1            | 0.5 | 0.039             | 1.3            | 0.0 | 0.187             | 1.3            | 0.7   | 0.640             |
| BAZ2A  | 2.6            | 0.1 | 0.023             | 0.8            | 0.1 | 0.213             | 1.4            | 0.7   | 0.495             |
| BAZ2B  | 5.0            | 1.5 | 0.022             | 1.7            | 0.9 | 0.325             | 11.3           | 5.8   | 0.024             |
| BMI1   | 7.4            | 1.2 | 0.017             | 8.8            | 0.9 | 0.023             | 28.0           | 11.7  | 0.010             |
| BPTF   | 3.0            | 1.0 | 0.050             | 1.2            | 0.5 | 0.759             | 4.4            | 3.1   | 0.054             |
| BRD1   | 3.1            | 0.6 | 0.022             | 2.0            | 0.6 | 0.042             | 1.5            | 0.5   | 0.181             |
| BRD2   | 1.4            | 0.2 | 0.116             | 0.8            | 0.1 | 0.177             | 1.3            | 0.3   | 0.285             |
| BRD3   | 1.5            | 0.6 | 0.291             | 0.7            | 0.1 | 0.115             | 0.4            | 0.2   | 0.073             |
| BRD4   | 2.4            | 0.7 | 0.070             | 1.0            | 0.2 | 0.951             | 1.0            | 0.1   | 0.936             |
| BRD7   | 2.2            | 0.2 | 0.045             | 0.5            | 0.1 | 0.056             | 2.1            | 1.1   | 0.126             |
| BRD8   | 2.4            | 0.4 | 0.025             | 1.0            | 0.3 | 0.962             | 3.5            | 1.2   | 0.023             |
| BRDT   | 0.6            | 0.4 | 0.358             | 0.2            | 0.1 | 0.065             | 325.1          | 559.2 | 0.341             |
| BRPF1  | 1.6            | 0.3 | 0.128             | 1.9            | 0.4 | 0.074             | 2.6            | 0.7   | 0.036             |
| BRPF3  | 2.2            | 0.4 | 0.027             | 1.1            | 0.1 | 0.402             | 1.7            | 0.3   | 0.041             |
| BRWD1  | 2.8            | 0.6 | 0.023             | 0.8            | 0.2 | 0.321             | 5.6            | 0.4   | 0.010             |
| BRWD2  | 2.1            | 0.4 | 0.027             | 1.0            | 0.1 | 0.827             | 2.3            | 0.2   | 0.010             |
| BRWD3  | 1.7            | 0.4 | 0.080             | 0.5            | 0.2 | 0.106             | 1.2            | 0.1   | 0.058             |
| CARM1  | 1.2            | 0.3 | 0.295             | 1.1            | 0.1 | 0.391             | 0.4            | 0.0   | 0.008             |
| CBX1   | 2.1            | 0.5 | 0.045             | 0.7            | 0.4 | 0.326             | 0.8            | 0.4   | 0.447             |
| CBX3   | 2.1            | 0.6 | 0.063             | 1.1            | 0.1 | 0.219             | 0.6            | 0.1   | 0.035             |
| CBX4   | 3.4            | 0.8 | 0.022             | 2.8            | 0.2 | 0.014             | 4.8            | 0.8   | 0.009             |
| CBX5   | 3.1            | 0.4 | 0.024             | 1.5            | 0.3 | 0.092             | 1.0            | 0.4   | 0.844             |
| CBX6   | 3.3            | 1.3 | 0.031             | 12.8           | 4.2 | 0.015             | 11.4           | 2.5   | 0.010             |
| CBX7   | 1.8            | 0.1 | 0.021             | 0.6            | 0.4 | 0.276             | 61.0           | 5.7   | 0.007             |
| CBX8   | 10.9           | 1.9 | 0.019             | 5.7            | 2.3 | 0.028             | 7.2            | 1.8   | 0.011             |
| CDYL   | 1.1            | 0.2 | 0.909             | 0.4            | 0.0 | 0.019             | 0.6            | 0.2   | 0.115             |
| CDYL2  | 5.9            | 3.4 | 0.066             | 0.5            | 0.1 | 0.032             | 19.4           | 8.9   | 0.020             |
| CHD1   | 3.8            | 0.8 | 0.023             | 1.4            | 0.1 | 0.108             | 2.0            | 0.3   | 0.025             |
| CHD2   | 3.8            | 1.3 | 0.040             | 1.3            | 0.2 | 0.187             | 3.9            | 1.5   | 0.033             |
| CHD3   | 1.7            | 0.8 | 0.226             | 4.0            | 1.2 | 0.024             | 3.5            | 0.3   | 0.021             |
| CHD4   | 3.4            | 1.3 | 0.044             | 1.2            | 0.2 | 0.511             | 1.9            | 1.2   | 0.317             |
| CHD5   | 1.0            | 0.1 | 0.915             | 0.7            | 0.4 | 0.331             | 67.7           | 35.9  | 0.010             |
| CHD6   | 4.0            | 0.7 | 0.023             | 2.2            | 0.9 | 0.096             | 3.7            | 2.2   | 0.051             |
| CHD7   | 6.0            | 1.9 | 0.023             | 0.1            | 0.1 | 0.042             | 2.6            | 0.1   | 0.009             |

|         |      |     |       |      |     |       |       |      |       |
|---------|------|-----|-------|------|-----|-------|-------|------|-------|
| CHD8    | 1.9  | 0.6 | 0.053 | 0.7  | 0.1 | 0.156 | 2.1   | 0.6  | 0.043 |
| CHD9    | 4.6  | 0.3 | 0.042 | 5.0  | 1.9 | 0.031 | 7.0   | 2.3  | 0.019 |
| CIITA   | 4.8  | 4.6 | 0.174 | 10.8 | 7.5 | 0.058 | 15.2  | 4.1  | 0.029 |
| CSRP2BP | 1.5  | 0.2 | 0.033 | 1.0  | 0.3 | 0.819 | 1.3   | 0.6  | 0.634 |
| CTBP1   | 2.8  | 1.0 | 0.048 | 1.5  | 0.0 | 0.046 | 3.5   | 0.4  | 0.008 |
| CTBP2   | 1.2  | 0.1 | 0.157 | 1.2  | 0.2 | 0.398 | 1.4   | 0.6  | 0.323 |
| CTCF    | 1.7  | 0.2 | 0.030 | 0.8  | 0.1 | 0.184 | 1.0   | 0.5  | 0.880 |
| DNMT1   | 2.9  | 1.8 | 0.100 | 6.5  | 4.3 | 0.120 | 8.9   | 8.0  | 0.273 |
| DNMT3A  | 1.6  | 0.3 | 0.047 | 0.8  | 0.3 | 0.346 | 0.3   | 0.1  | 0.042 |
| DNMT3B  | 0.1  | 0.1 | 0.038 | 0.0  | 0.0 | 0.018 | 0.0   | 0.0  | 0.010 |
| DOT1L   | 2.0  | 0.4 | 0.033 | 0.4  | 0.0 | 0.016 | 0.5   | 0.3  | 0.155 |
| DZIP3   | 2.1  | 0.1 | 0.021 | 0.6  | 0.2 | 0.143 | 2.8   | 0.9  | 0.036 |
| EED     | 3.4  | 0.5 | 0.022 | 1.0  | 0.2 | 0.940 | 2.5   | 1.0  | 0.053 |
| EHMT2   | 2.0  | 0.3 | 0.030 | 0.6  | 0.2 | 0.078 | 1.0   | 0.1  | 0.478 |
| ESCO1   | 1.3  | 0.2 | 0.108 | 0.6  | 0.2 | 0.131 | 1.8   | 0.6  | 0.121 |
| ESCO2   | 1.7  | 0.5 | 0.121 | 2.0  | 0.6 | 0.061 | 0.1   | 0.0  | 0.010 |
| EZH1    | 1.9  | 0.6 | 0.174 | 1.7  | 0.8 | 0.299 | 24.8  | 7.7  | 0.010 |
| EZH2    | 3.3  | 0.5 | 0.044 | 1.0  | 0.2 | 0.905 | 0.1   | 0.1  | 0.016 |
| HAT1    | 1.8  | 0.2 | 0.021 | 1.4  | 0.2 | 0.038 | 1.5   | 0.3  | 0.117 |
| HDAC1   | 2.4  | 0.4 | 0.021 | 0.5  | 0.2 | 0.112 | 1.6   | 0.9  | 0.337 |
| HDAC10  | 2.2  | 0.5 | 0.040 | 2.0  | 0.7 | 0.106 | 2.7   | 0.7  | 0.025 |
| HDAC11  | 1.8  | 0.8 | 0.128 | 3.0  | 1.4 | 0.099 | 6.0   | 2.8  | 0.042 |
| HDAC2   | 2.5  | 0.3 | 0.070 | 1.3  | 0.3 | 0.414 | 9.3   | 1.2  | 0.023 |
| HDAC3   | 1.3  | 0.3 | 0.205 | 1.1  | 0.4 | 0.851 | 1.6   | 0.5  | 0.163 |
| HDAC4   | 1.9  | 0.4 | 0.043 | 0.7  | 0.2 | 0.146 | 6.0   | 1.1  | 0.012 |
| HDAC5   | 5.0  | 1.6 | 0.025 | 1.5  | 0.7 | 0.382 | 18.5  | 3.1  | 0.008 |
| HDAC6   | 4.6  | 0.9 | 0.023 | 2.5  | 0.4 | 0.028 | 6.0   | 1.1  | 0.013 |
| HDAC7   | 4.7  | 4.3 | 0.132 | 6.2  | 3.1 | 0.048 | 11.0  | 5.7  | 0.033 |
| HDAC8   | 4.8  | 0.2 | 0.022 | 3.3  | 0.8 | 0.025 | 5.8   | 2.1  | 0.030 |
| HDAC9   | 18.8 | 8.5 | 0.021 | 16.8 | 6.3 | 0.023 | 44.5  | 21.6 | 0.013 |
| HINFP   | 1.7  | 0.1 | 0.229 | 0.6  | 0.2 | 0.199 | 1.2   | 0.1  | 0.556 |
| ING1    | 2.0  | 0.6 | 0.103 | 0.9  | 0.2 | 0.618 | 2.4   | 0.5  | 0.042 |
| ING2    | 1.8  | 0.4 | 0.038 | 1.1  | 0.2 | 0.401 | 2.1   | 0.6  | 0.036 |
| ING3    | 3.3  | 0.3 | 0.027 | 1.5  | 0.3 | 0.127 | 3.1   | 1.1  | 0.029 |
| ING4    | 3.8  | 0.2 | 0.020 | 4.2  | 1.9 | 0.059 | 3.1   | 0.5  | 0.012 |
| ING5    | 2.3  | 0.3 | 0.021 | 0.9  | 0.2 | 0.477 | 2.2   | 0.5  | 0.026 |
| INO80   | 1.5  | 0.2 | 0.040 | 1.0  | 0.1 | 0.929 | 2.1   | 0.5  | 0.029 |
| KAT2A   | 2.1  | 0.7 | 0.074 | 1.1  | 0.1 | 0.410 | 3.3   | 1.2  | 0.045 |
| KAT2B   | 21.6 | 9.5 | 0.020 | 13.9 | 8.0 | 0.031 | 235.0 | 97.3 | 0.008 |
| KAT5    | 2.0  | 0.6 | 0.073 | 1.1  | 0.0 | 0.031 | 3.1   | 1.6  | 0.074 |
| KDM1    | 1.9  | 0.2 | 0.024 | 0.6  | 0.1 | 0.047 | 0.6   | 0.2  | 0.131 |
| KDM4A   | 0.9  | 0.2 | 0.665 | 0.7  | 0.1 | 0.092 | 0.8   | 0.2  | 0.244 |
| KDM4C   | 1.4  | 0.1 | 0.040 | 0.4  | 0.1 | 0.024 | 2.2   | 0.4  | 0.017 |
| KDM5B   | 1.3  | 0.2 | 0.048 | 0.6  | 0.3 | 0.188 | 0.4   | 0.3  | 0.104 |
| KDM5C   | 1.5  | 0.2 | 0.263 | 1.2  | 0.5 | 0.796 | 0.7   | 0.5  | 0.386 |
| KDM6B   | 3.2  | 0.6 | 0.021 | 1.3  | 0.5 | 0.350 | 1.1   | 0.1  | 0.460 |
| MBD1    | 2.4  | 0.6 | 0.045 | 1.5  | 0.1 | 0.081 | 2.2   | 0.3  | 0.012 |
| MBD2    | 3.3  | 0.4 | 0.018 | 1.9  | 0.6 | 0.054 | 4.1   | 0.6  | 0.009 |
| MBD3    | 1.8  | 0.6 | 0.088 | 1.8  | 0.3 | 0.042 | 2.6   | 1.0  | 0.032 |
| MBD4    | 2.4  | 0.4 | 0.023 | 0.5  | 0.1 | 0.020 | 2.6   | 0.6  | 0.029 |

|         |      |     |       |      |     |       |       |      |       |
|---------|------|-----|-------|------|-----|-------|-------|------|-------|
| MECP2   | 8.4  | 1.4 | 0.019 | 3.8  | 1.1 | 0.031 | 23.3  | 4.5  | 0.008 |
| MLL     | 2.6  | 1.2 | 0.145 | 0.9  | 0.3 | 0.519 | 3.8   | 1.7  | 0.056 |
| MLL3    | 2.9  | 1.4 | 0.103 | 1.9  | 0.8 | 0.158 | 3.7   | 1.6  | 0.047 |
| MLL5    | 3.5  | 1.1 | 0.035 | 2.3  | 0.8 | 0.056 | 9.9   | 1.5  | 0.005 |
| MTA1    | 1.6  | 0.5 | 0.151 | 0.7  | 0.0 | 0.131 | 0.7   | 0.2  | 0.155 |
| MTA2    | 2.1  | 0.5 | 0.049 | 1.1  | 0.3 | 0.741 | 1.2   | 0.8  | 0.915 |
| MYSM1   | 1.3  | 0.3 | 0.174 | 0.4  | 0.1 | 0.027 | 1.5   | 0.2  | 0.036 |
| MYST1   | 2.4  | 0.3 | 0.019 | 1.3  | 0.4 | 0.545 | 2.8   | 0.6  | 0.015 |
| MYST2   | 2.0  | 0.5 | 0.074 | 0.5  | 0.1 | 0.048 | 0.8   | 0.2  | 0.357 |
| MYST3   | 5.5  | 1.6 | 0.021 | 3.6  | 1.1 | 0.030 | 14.6  | 9.8  | 0.029 |
| MYST4   | 12.7 | 8.1 | 0.038 | 9.6  | 5.5 | 0.047 | 110.6 | 64.6 | 0.012 |
| NAB2    | 5.5  | 3.9 | 0.062 | 4.5  | 1.2 | 0.020 | 1.5   | 0.2  | 0.067 |
| NCOA1   | 3.1  | 0.9 | 0.044 | 5.4  | 2.3 | 0.032 | 39.1  | 33.3 | 0.016 |
| NCOA3   | 3.8  | 0.6 | 0.019 | 1.2  | 0.5 | 0.684 | 2.5   | 0.5  | 0.015 |
| NCOA6   | 9.0  | 0.8 | 0.019 | 5.7  | 0.8 | 0.016 | 20.1  | 5.0  | 0.010 |
| NEK6    | 5.9  | 3.6 | 0.049 | 7.8  | 1.3 | 0.000 | 10.0  | 4.9  | 0.026 |
| NSD1    | 2.0  | 0.4 | 0.079 | 0.7  | 0.1 | 0.114 | 2.3   | 0.3  | 0.010 |
| PAK1    | 0.8  | 0.2 | 0.233 | 0.5  | 0.1 | 0.026 | 0.8   | 0.4  | 0.364 |
| PBRM1   | 3.7  | 0.7 | 0.018 | 1.9  | 0.2 | 0.024 | 3.5   | 1.0  | 0.014 |
| PCGF1   | 2.3  | 0.4 | 0.027 | 1.7  | 0.4 | 0.077 | 3.0   | 0.6  | 0.022 |
| PCGF2   | 2.1  | 0.0 | 0.031 | 1.2  | 0.2 | 0.292 | 1.2   | 0.2  | 0.497 |
| PCGF3   | 4.3  | 0.6 | 0.021 | 2.4  | 1.5 | 0.241 | 6.3   | 1.2  | 0.009 |
| PCGF5   | 3.5  | 0.9 | 0.021 | 1.4  | 0.0 | 0.144 | 34.4  | 14.3 | 0.009 |
| PCGF6   | 1.8  | 0.1 | 0.054 | 0.8  | 0.1 | 0.195 | 1.1   | 0.2  | 0.647 |
| PHC1    | 0.2  | 0.0 | 0.023 | 0.1  | 0.0 | 0.012 | 0.1   | 0.1  | 0.029 |
| PHC2    | 26.9 | 9.9 | 0.018 | 18.0 | 4.3 | 0.012 | 11.8  | 2.7  | 0.011 |
| PHF1    | 4.5  | 1.2 | 0.098 | 1.7  | 0.4 | 0.433 | 12.5  | 6.5  | 0.029 |
| PHF13   | 2.2  | 1.2 | 0.133 | 1.1  | 0.3 | 0.815 | 0.5   | 0.2  | 0.074 |
| PHF2    | 6.2  | 0.5 | 0.021 | 7.0  | 2.2 | 0.020 | 12.7  | 4.7  | 0.010 |
| PHF21A  | 3.4  | 1.4 | 0.045 | 1.6  | 0.6 | 0.265 | 4.9   | 2.0  | 0.025 |
| PHF21B  | 3.5  | 1.2 | 0.030 | 0.3  | 0.2 | 0.091 | 6.2   | 6.2  | 0.129 |
| PHF3    | 2.2  | 0.6 | 0.039 | 1.0  | 0.2 | 0.826 | 2.0   | 0.8  | 0.129 |
| PHF5A   | 1.7  | 0.4 | 0.104 | 0.5  | 0.1 | 0.069 | 0.9   | 0.0  | 0.453 |
| PHF6    | 4.0  | 1.1 | 0.021 | 0.6  | 0.3 | 0.246 | 1.3   | 0.2  | 0.228 |
| PHF7    | 1.1  | 0.2 | 0.808 | 0.6  | 0.3 | 0.205 | 1.3   | 0.2  | 0.346 |
| PRMT1   | 1.4  | 0.4 | 0.141 | 0.6  | 0.0 | 0.036 | 0.4   | 0.0  | 0.021 |
| PRMT2   | 2.5  | 1.0 | 0.056 | 2.8  | 0.4 | 0.025 | 4.6   | 1.4  | 0.023 |
| PRMT3   | 1.6  | 0.2 | 0.106 | 0.6  | 0.1 | 0.082 | 1.6   | 0.9  | 0.497 |
| PRMT5   | 1.3  | 0.1 | 0.164 | 0.7  | 0.1 | 0.110 | 0.9   | 0.5  | 0.588 |
| PRMT6   | 1.7  | 0.6 | 0.153 | 2.1  | 0.1 | 0.032 | 1.4   | 1.1  | 0.841 |
| PRMT7   | 1.8  | 0.1 | 0.021 | 1.5  | 0.5 | 0.191 | 4.1   | 0.9  | 0.016 |
| PRMT8   | 1.4  | 0.5 | 0.237 | 5.7  | 3.5 | 0.077 | 20.5  | 15.0 | 0.028 |
| RING1   | 4.3  | 0.4 | 0.023 | 2.7  | 0.7 | 0.032 | 8.4   | 3.6  | 0.013 |
| RNF2    | 2.8  | 0.4 | 0.023 | 1.4  | 0.2 | 0.085 | 0.9   | 0.2  | 0.406 |
| RNF20   | 1.6  | 0.2 | 0.031 | 1.3  | 0.1 | 0.053 | 3.5   | 1.6  | 0.044 |
| RPS6KA3 | 7.2  | 0.1 | 0.021 | 7.0  | 0.6 | 0.025 | 15.6  | 5.2  | 0.011 |
| RPS6KA5 | 4.8  | 1.8 | 0.038 | 0.8  | 0.5 | 0.476 | 21.6  | 6.6  | 0.008 |
| SETD1A  | 1.7  | 0.5 | 0.092 | 1.2  | 0.2 | 0.242 | 1.3   | 0.2  | 0.107 |
| SETD1B  | 1.9  | 0.5 | 0.072 | 1.8  | 0.4 | 0.041 | 2.5   | 0.5  | 0.016 |
| SETD2   | 2.8  | 0.4 | 0.019 | 1.9  | 0.5 | 0.060 | 4.8   | 2.4  | 0.035 |

|          |     |     |       |      |     |       |      |      |       |
|----------|-----|-----|-------|------|-----|-------|------|------|-------|
| SETD3    | 1.5 | 0.2 | 0.048 | 1.0  | 0.3 | 0.947 | 4.2  | 2.1  | 0.042 |
| SETD4    | 2.1 | 0.3 | 0.049 | 0.9  | 0.1 | 0.609 | 3.1  | 1.0  | 0.029 |
| SETD5    | 2.3 | 0.4 | 0.022 | 1.3  | 0.3 | 0.237 | 0.8  | 0.2  | 0.256 |
| SETD6    | 2.6 | 0.4 | 0.021 | 0.6  | 0.2 | 0.136 | 2.0  | 0.5  | 0.068 |
| SETD7    | 8.2 | 0.5 | 0.025 | 10.5 | 1.5 | 0.020 | 48.7 | 14.5 | 0.007 |
| SETD8    | 3.0 | 0.6 | 0.023 | 3.0  | 0.7 | 0.030 | 4.3  | 1.5  | 0.028 |
| SETDB1   | 2.5 | 0.7 | 0.038 | 1.1  | 0.2 | 0.801 | 1.2  | 0.2  | 0.307 |
| SETDB2   | 2.4 | 0.1 | 0.022 | 1.6  | 0.3 | 0.045 | 5.6  | 1.2  | 0.010 |
| SMARCA2  | 0.7 | 0.3 | 0.333 | 29.5 | 9.7 | 0.035 | 63.9 | 19.1 | 0.006 |
| SMARCA4  | 2.2 | 0.9 | 0.131 | 0.5  | 0.0 | 0.105 | 1.1  | 0.3  | 0.776 |
| SMYD3    | 2.0 | 0.2 | 0.053 | 0.9  | 0.1 | 0.555 | 1.9  | 1.3  | 0.317 |
| SPEN     | 3.5 | 1.4 | 0.037 | 1.0  | 0.3 | 0.982 | 4.8  | 2.2  | 0.024 |
| SUV39H1  | 1.1 | 0.3 | 0.641 | 0.6  | 0.1 | 0.033 | 1.9  | 0.6  | 0.100 |
| SUV420H1 | 2.4 | 0.9 | 0.049 | 1.2  | 0.3 | 0.533 | 3.0  | 0.7  | 0.024 |
| SUZ12    | 2.7 | 0.6 | 0.023 | 1.1  | 0.2 | 0.784 | 1.2  | 0.1  | 0.235 |
| TET1     | 1.1 | 0.5 | 0.890 | 0.6  | 0.5 | 0.290 | 0.6  | 0.3  | 0.304 |
| TET2     | 5.5 | 2.0 | 0.025 | 4.4  | 2.7 | 0.076 | 56.5 | 0.9  | 0.010 |
| TRIM27   | 3.0 | 0.4 | 0.021 | 1.7  | 0.6 | 0.166 | 2.6  | 1.4  | 0.105 |
| UBE2A    | 2.5 | 0.5 | 0.038 | 3.2  | 0.5 | 0.042 | 7.2  | 3.2  | 0.017 |
| UBE2B    | 2.3 | 0.2 | 0.038 | 2.7  | 0.3 | 0.032 | 6.0  | 1.4  | 0.010 |
| USP16    | 2.6 | 0.2 | 0.020 | 3.3  | 0.4 | 0.013 | 9.1  | 3.7  | 0.023 |
| USP21    | 2.4 | 0.4 | 0.027 | 2.2  | 0.5 | 0.041 | 7.2  | 2.7  | 0.024 |
| USP22    | 1.6 | 0.5 | 0.134 | 1.2  | 0.2 | 0.190 | 1.2  | 0.3  | 0.291 |
| WHSC1    | 4.3 | 0.5 | 0.019 | 1.3  | 0.1 | 0.030 | 2.3  | 1.1  | 0.105 |
| ZMYND8   | 1.0 | 0.2 | 0.883 | 0.4  | 0.1 | 0.034 | 2.0  | 1.0  | 0.186 |
