# Supplementary material for: Extensive Transcriptional Regulation of Chromatin Modifiers during Human Neurodevelopment
Source: PubMed Central journal article supplement (PMC3348879; doi:10.1371/journal.pone.0036708), 2012-05-09

Figure S6: Comparison of relative expression data from microarray and qPCR

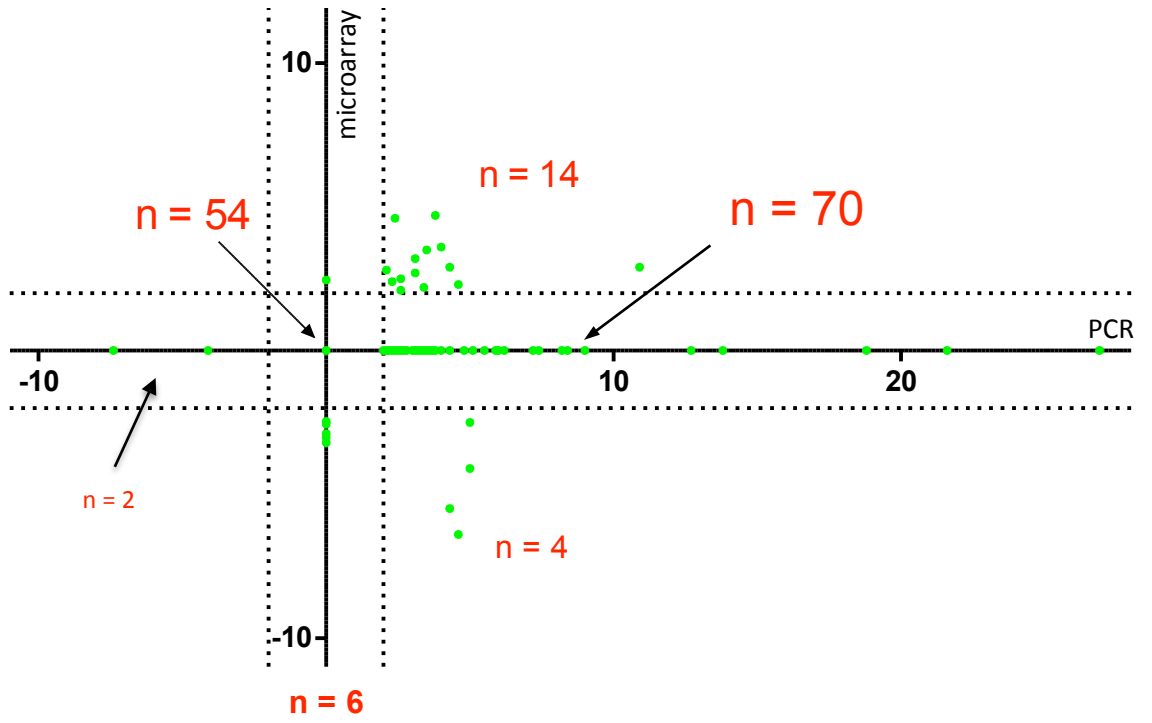

Supplement: pone.0036708.s006.pdf [file pone.0036708.s006.pdf]
